# ***APOK3*, a pollen killer antidote in *Arabidopsis thaliana***

Matthieu Simon<sup>1</sup>, Stéphanie Durand<sup>1</sup>, Anthony Ricou<sup>1</sup>, Nathalie Vrielynck<sup>1</sup>, Baptiste Mayjonade<sup>2</sup>, Jérôme Gouzy<sup>2</sup>, Roxane Boyer<sup>3</sup>, Fabrice Roux<sup>2</sup>, Christine Camilleri<sup>1</sup>, Françoise Budar<sup>1</sup>.

<sup>1</sup>Institut Jean-Pierre Bourgin, INRAE, AgroParisTech, Université Paris-Saclay, 78000, Versailles, France

<sup>2</sup>LIPME, Université de Toulouse, INRAE, CNRS, 31326 Castanet-Tolosan, France

<sup>3</sup>INRAE, GeT-PlaGe, Genotoul, 31326 Castanet-Tolosan, France

(doi:10.15454/1.5572370921303193E12)

Running title: Pollen killer in *Arabidopsis thaliana*

Keywords: transmission ratio distortion, pollen killer, poison-antidote, structural variation, *Arabidopsis thaliana*.

## **Abstract**

According to the principles of heredity, each parental allele of hybrids equally participates in the progeny. At some loci, however, it happens that one allele is favored to the expense of the other. Gamete killers are genetic systems where one allele (the killer) triggers the death of the gametes carrying the other (killed) allele. They have been found in many organisms, and are of major interest to understand mechanisms of evolution and speciation. Gamete killers are particularly prevalent in plants, where they can compromise crop breeding. Here, we deciphered a pollen killer in *Arabidopsis thaliana* by exploiting natural variation, *de novo* genomic sequencing and mutants, and analyzing segregations in crosses. We found that the killer allele carries an antidote gene flanked by two elements mandatory for the killing activity. We identified the gene encoding the antidote, a chimeric protein addressed to mitochondria. This gene appeared in the species by association of domains recruited from other genes, and it recently underwent duplications within a highly variable locus, particularly in the killer genotypes. Exploring the species diversity, we identified sequence polymorphisms correlated with the antidote activity.

## **Introduction**

Genetic loci that do not comply with Mendel's laws have been observed since the dawn of genetics. First considered as being genetic curiosities, these loci with transmission ratio distortion (TRD) are now recognized to be common in fungi, plants and animals, with a particularly high incidence in plants (Fishman and McIntosh 2019). They are of major interest to understand genomic evolution, adaptation and speciation (Presgraves, 2010; Lindholm et al,

39 2016; Fishman & Sweigart, 2018; Agren & Clarck, 2018). In addition, they have significant  
40 impacts on plant breeding, disturbing QTL mapping and hampering the use of genetic  
41 resources. Cases of TRD have been reported in multiple plant species, with most studies  
42 conducted in rice and in *Arabidopsis thaliana*. In rice, TRD is very common in inter-specific  
43 and sub-specific crosses, and often linked to hybrid sterility (Ouyang and Zhang 2018), limiting  
44 interspecific crosses suitable for breeding (Matsubara et al. 2011; Zhang et al. 2020). For  
45 instance, 18 genomic regions were recently found to be distorted in a cross between *Oryza*  
46 *sativa* ssp *japonica* and *O. sativa* ssp *indica* (Zhang et al. 2020). In the genus *Arabidopsis*, many  
47 examples of inter or intra-specific hybrid incompatibilities were also reported (reviewed in Vaid  
48 and Laitinen, 2019). In *A. thaliana*, TRD was observed in over half of a set of 17 F2 populations  
49 (Salomé et al, (2012). More recently, at least one TRD was detected in ~25% of a set of 500 F2  
50 populations, corresponding to more than one hundred distorted genomic regions (Seymour et  
51 al. 2019).

52 Causes of TRD are often classified into two main non-exclusive types, *i.e.* (i) Bateson-  
53 Dobzhansky-Muller (BDM) incompatibilities, where independently evolved alleles result in  
54 deleterious or sub-optimal phenotypes when brought together, and (ii) allele specific gamete  
55 elimination, where one allele takes over the alternative allele in the gametes produced by a  
56 heterozygote (reviewed in Ouyang and Zhang, 2013). Allele-specific gamete elimination can  
57 occur at the meiotic stage, hence designated meiotic driver. It is the case, for example, of the B  
58 chromosomes of cereals (Östergren 1945; Houben 2017) and the driving centromere in yellow  
59 monkeyflower (Finseth et al. 2015; Finseth et al. 2021). Alternatively, gamete elimination  
60 occurs after meiosis when the favoured (killer) allele induces a defect in the gametes that carry  
61 the alternative (killed) one, eventually causing their underrepresentation in the next generation.  
62 Such a situation was observed for the *wtf* genes in fission yeast (Nuckolls et al. 2017), the *Spok*  
63 genes in *Podospora anserina* (Gronet et al. 2014), the *SD* system in *Drosophila melanogaster*  
64 (Larracuent and Presgraves 2012), and the *Sa* (Long et al. 2008) and *S5* (Yang et al. 2012) loci  
65 in rice. In plants, loci causing TRD by allele specific gamete elimination are designated gamete  
66 killers, or more specifically pollen killers (PK) when they affect the male gametes. In the  
67 unraveled TRD cases in *A. thaliana*, the identification of causal genes showed that the  
68 distortions resulted from BDM incompatibilities between parental alleles (or epialleles), most  
69 often located at physically unlinked loci (Bomblies et al. 2007; Bikard et al. 2009; Durand et  
70 al. 2012; Agorio et al. 2017; Jiao et al. 2021), or at one locus (Smith et al, 2011). However, in  
71 contrast to rice where several gamete killers have been studied (Ouyang and Zhang 2013), PKs

72 have been reported only once in *A. thaliana* (Simon et al, 2016), and to our knowledge none  
73 has been molecularly deciphered so far in this species.

74 Meiotic drivers and gamete killers have retained particular attention for their potential in  
75 triggering genomic conflicts (Lindholm et al. 2016; Agren and Clark 2018). The most intriguing  
76 feature of gamete killers is that killer alleles trigger a defect in the gametes that do not carry  
77 them. This can be explained by one of two main genetic models (Bravo Nunez et al. 2018),  
78 schematically represented in Figure 1. In both models, all the genes responsible for gamete  
79 elimination are tightly linked and the killing factor is produced before (or during) meiosis, and  
80 still present in all the developing gametes. In the 'killer-target' model, a partner (the target),  
81 necessary for the killing activity, is encoded by the killed allele and expressed after meiosis,  
82 thus present only in gametes that carry it. This model applies to the *SD* system of *D.*  
83 *melanogaster* and the Sa locus of rice, for example (Bravo Nunez et al. 2018). In the 'poison-  
84 antidote' model, the killer allele also produces an antidote that counteracts the poison, but  
85 whereas the poison produced before meiosis subsists in the gametes, the antidote does not, so  
86 only the gametes that are able to produce it are rescued. Poison-antidote type segregation  
87 distorters have been described in fungi and plants and include the fission yeast *wtf* genes  
88 (Nuckolls et al. 2017) and the rice *qHMS7* PK (Yu et al. 2018).

89 Here we decipher one of the PKs that were uncovered to contribute to a male sterility observed  
90 in hybrids between two *A. thaliana* natural variants, Shahdara (Sha) and Mr-0 (Simon et al,  
91 2016). We show that this PK, located at the bottom of chromosome 3, belongs to the poison-  
92 antidote class, and we identified the antidote gene. This gene is chimeric and encodes a  
93 mitochondrial protein; it originated and evolved in the species *A. thaliana* within a highly  
94 variable locus. We precisely characterized the locus, showing that it contains at least two killer  
95 elements required for its activity, flanking the antidote gene. By exploring the diversity within  
96 the species, we found this PK in a number of *A. thaliana* hybrids. We then showed that in the  
97 killer genotypes, the locus strongly differs from those of neutral and killed genotypes by  
98 important structural variations, including duplications of the antidote gene. Lastly, we identified  
99 in the antidote several polymorphisms that correlate with its protective activity.

## 100 **Results**

### 101 **Elements leading to a segregation bias at the L3 locus are common in natural variants of** 102 ***A. thaliana***

103 Amongst the PKs detected in the selfed progeny of Mr-0 x Sha hybrids (Simon et al. 2016), the  
104 L3 locus, located at the bottom of chromosome 3, induced a deficit in Sha homozygous  
105 progenies. This was linked to the death of pollen grains carrying the Sha allele at this locus. We  
106 also observed a strong bias at L3 against the Rak-2 allele in the Mr-0 x Rak-2 F2 population  
107 (Simon et al. 2016), suggesting that some natural variants other than Sha possess at L3 alleles  
108 sensitive to the Mr-0 killer effect. Likewise, other variants than Mr-0 could carry killer alleles.  
109 After crossing 30 accessions belonging to different diversity groups (Simon et al. 2012) to Mr-0  
110 and/or Sha, we analyzed the segregation at L3 in the progeny of the hybrids to reveal a possible  
111 killed or killer behaviour. Similar to Sha, 14 of the 26 accessions tested in crosses with Mr-0  
112 for the killed status showed a bias in the progeny of their hybrid (Table 1). Genotype  
113 proportions were consistent with a 1:1 distribution of homozygotes Mr-0 and heterozygotes in  
114 most of the biased segregations, as expected if there is a gametophytic defect in these hybrids  
115 (Table1 Source Data 1). On the other hand, among 18 accessions analyzed for a killer  
116 behaviour, five induced a bias in the progeny of their hybrid with Sha, as did Mr-0 (Table 1),  
117 with a distribution of genotypes that was consistent with a gametophytic defect (Table1 Source  
118 Data 2). Among the 14 accessions that were tested for both killed and killer status, five  
119 accessions, including Col-0, had a neutral behaviour (neither killed nor killer). And, coherently,  
120 none of these 14 accessions was found to have both a killed and a killer behaviour (Table 1).

121 Table 1: Killed or killer behaviors of natural accessions

| Accession                  | Country            | Bias in cross with Mr-0: killed behaviour <sup>(1)</sup> | Bias in cross with Sha: killer behaviour <sup>(2)</sup> |
|----------------------------|--------------------|----------------------------------------------------------|---------------------------------------------------------|
| <b>Shigu-2</b>             | Russia             | No                                                       | Yes                                                     |
| <b>Cant-1</b>              | Spain              | No                                                       | Yes                                                     |
| <b>Etna-2</b>              | Italy              | No                                                       | Yes                                                     |
| <b>Ct-1</b>                | Italy              | No                                                       | Yes                                                     |
| <b>Jea</b>                 | France             | No                                                       | Yes                                                     |
| <b>Lov-5</b>               | Sweden             | No                                                       | No                                                      |
| <b>Blh-1</b>               | Czech Republic     | No                                                       | No                                                      |
| <b>Col-0</b>               | Poland             | No                                                       | No                                                      |
| <b>Bur-0</b>               | Ireland            | No                                                       | No                                                      |
| <b>Oy-0</b>                | Norway             | No                                                       | No                                                      |
| <b>Koch-1</b>              | Ukrainia           | No                                                       | nd                                                      |
| <b>N16</b>                 | Russia             | No                                                       | nd                                                      |
| <b>Sorbo</b>               | Tajikistan         | Yes                                                      | No                                                      |
| <b>Cvi-0</b>               | Cape Verde Islands | Yes                                                      | No                                                      |
| <b>Ita-0<sup>(3)</sup></b> | Morocco            | Yes                                                      | No                                                      |
| <b>Are-10</b>              | Portugal           | Yes                                                      | No                                                      |
| <b>Are-1</b>               | Portugal           | Yes                                                      | nd                                                      |
| <b>Kas-2</b>               | India              | Yes                                                      | nd                                                      |
| <b>Kz-1</b>                | Kazakhstan         | Yes                                                      | nd                                                      |
| <b>Kidr-1</b>              | Russia             | Yes                                                      | nd                                                      |
| <b>Kly-1</b>               | Russia             | Yes                                                      | nd                                                      |
| <b>N13</b>                 | Russia             | Yes                                                      | nd                                                      |
| <b>Nov-01</b>              | Russia             | Yes                                                      | nd                                                      |
| <b>Rak-2</b>               | Russia             | Yes                                                      | nd                                                      |
| <b>Stepn-1</b>             | Russia             | Yes                                                      | nd                                                      |
| <b>Zal-3</b>               | Kyrgyzstan         | Yes                                                      | nd                                                      |
| <b>Kz-9</b>                | Kazakhstan         | nd                                                       | No                                                      |
| <b>Kas-1</b>               | India              | nd                                                       | No                                                      |
| <b>Qar-8a</b>              | Lebanon            | nd                                                       | No                                                      |
| <b>Etn-0</b>               | Italy              | nd                                                       | No                                                      |

122 <sup>(1)</sup> Table1-Source Data 1: Segregations at L3 in progenies of crosses of Mr-0 with different  
 123 natural accessions. <sup>(2)</sup> Table1-Source Data 2: Segregations at L3 in progenies of crosses of  
 124 different natural accessions with Sha. <sup>(3)</sup> Ita-0 was tested by crossing not with Mr-0 but with  
 125 two other killer accessions, Ct-1 and Jea. nd: not determined.

126  
 127 Therefore, this segregation distorsion at L3 appears to be widespread in crosses between natural  
 128 accessions of *A. thaliana*, and we focused on the Mr-0 x Sha cross to investigate the underlying  
 129 genetic elements.

130  
 131 **The segregation distorter at L3 in Mr-0 x Sha hybrids induces an allele specific impaired**  
 132 **pollen development**

133 We previously showed that a plant segregating Sha and Mr-0 alleles only at L3 while fixed Sha  
 134 in the rest of its nuclear genome (hereafter ShaL3<sup>H</sup>) presented a strong bias against Sha  
 135 homozygous progenies, which was linked to a deficit in pollen grains carrying the Sha allele  
 136 (Simon et al. 2016). Here, we tested whether the segregation bias was dependent on the genetic  
 137 background by comparing the selfed progenies of ShaL3<sup>H</sup> with its equivalent in the Mr-0  
 138 nuclear background (MrL3<sup>H</sup>). Their progenies showed very similar deficits in Sha homozygotes  
 139 (Table 2), indicating that the segregation distortion was independent of the fixed parental  
 140 nuclear background. Accordingly, anthers from both genotypes showed similar proportions of  
 141 dead pollen (Figure 2).

**Table 2: Segregation analyses at L3 of selfed progenies in two different nuclear backgrounds**

| Genotype                          | Number of plants <sup>(1)</sup> |    |      |       | $p \chi^2 (1:2:1)$             | $f\text{Sha}^{(2)}$ |
|-----------------------------------|---------------------------------|----|------|-------|--------------------------------|---------------------|
|                                   | Sha                             | Hz | Mr-0 | Total |                                |                     |
| MrL3 <sup>H</sup>                 | 14                              | 83 | 73   | 170   | $1.2 \cdot 10^{-9} \text{***}$ | 0.08                |
| ShaL3 <sup>H</sup> <sup>(3)</sup> | 18                              | 87 | 73   | 178   | $4.0 \cdot 10^{-8} \text{***}$ | 0.10                |

142 <sup>(1)</sup> genotyped at marker M1 (described in Figure 5 Source Data 3). <sup>(2)</sup> Frequency of Sha  
 143 homozygotes (expected frequency 0.25). <sup>(3)</sup> from Simon *et al.* (2016). \*\*\*  $p < 0.001$ .

144  
 145 We further studied the ShaL3<sup>H</sup> genotype, which flowers earlier than MrL3<sup>H</sup>. We observed a  
 146 strong distortion when ShaL3<sup>H</sup> was used as male in a cross with Sha, but no distortion when it  
 147 served as female parent (Table 3). These results confirmed that the segregation distortion was  
 148 only due to a PK.

**Table 3: Transmission of the Sha allele in a heterozygous context from the male and female sides**

| Mother plant             | Number of plants <sup>(1)</sup> |     |       | $p \chi^2 (1:1)$                | $f\text{Sha}^{(2)}$ |
|--------------------------|---------------------------------|-----|-------|---------------------------------|---------------------|
|                          | Sha                             | Hz  | Total |                                 |                     |
| Sha x ShaL3 <sup>H</sup> | 40                              | 132 | 172   | $2.3 \cdot 10^{-12} \text{***}$ | 0.23                |
| ShaL3 <sup>H</sup> x Sha | 78                              | 90  | 168   | 0.4 <sup>NS</sup>               | 0.46                |

149 <sup>(1)</sup> genotyped at marker M9 (described in Figure 5 Source Data 3). <sup>(2)</sup> Frequency of Sha  
 150 homozygotes in the test-cross (expected frequency 0.5). \*\*\*  $p < 0.001$ ; NS, not significant.

151  
 152 We used cytological approaches to determine whether the male dysfunction occurred during  
 153 meiosis or during pollen development and to specify its timing. The male meiosis of ShaL3<sup>H</sup>  
 154 plants was identical to that of fixed siblings at all stages (Figure 3), excluding a meiotic defect  
 155 as the source of the segregation bias in ShaL3<sup>H</sup> plants. During male gametogenesis, abnormal  
 156 pollen grains were observed in anthers of ShaL3<sup>H</sup> plants from the bicellular stage, after the first

157 pollen division (Figure 4). The proportion of abnormal pollen increased in the tricellular stage,  
158 and about 35% of mature pollen grains were dead in ShaL3<sup>H</sup> plants (Figure 4), which reflects  
159 an incomplete penetrance since 50% dead pollen would be expected if the PK effect was total.  
160 We concluded that, in these plants, the Sha allele at L3 is poorly transmitted because most of  
161 the Sha pollen grains fail to develop properly from the binucleate stage and eventually die.

162

### 163 **The PK at L3 contains three genetic elements**

164 L3 was previously mapped in a 280 Kb interval at the bottom of chromosome 3 (Simon et al.  
165 2016). We fine-mapped the PK in the genotype ShaL3<sup>H</sup> using the presence of a segregation bias  
166 in the self-descent of recombinants as a robust phenotypic trait to narrow down the L3 interval:  
167 genetic markers fixed for Sha or Mr-0 alleles in recombinants with a significant bias in their  
168 progeny were excluded from the candidate interval. This strategy allowed us to map all the  
169 genetic elements necessary for the PK activity in an interval hereafter called PK3,  
170 corresponding to the region flanked by markers M5 and M13 (68 Kb in Col-0) (Figure 5A).  
171 Out of a total of 4,717 plants genotyped, we found six recombinants between M5 and M13.  
172 Recombination points of these recombinants, 27D6, 25A7, 52D12, 52D7, 8F10BH2 and 23G9  
173 were finely localized. Only three of these plants, 52D7, 8F10BH2 and 23G9, were recombined  
174 between M6 and M12, which are very close to M5 and M13, respectively (Figure 5 Source Data  
175 1). None of them presented a bias in its progeny whereas 27D6, 25A7 and 52D12, which are  
176 heterozygous between M6 and M12, did. Pollen viability of the recombinants, assessed by  
177 Alexander stainings, were consistent with the presence or absence of bias in their progenies  
178 (Figure 5B). Further information on the genetic structure of the PK3 was obtained from the  
179 three plants recombined between M6 and M12. First, by crossing 52D7 and 8F10BH2 with Sha,  
180 we converted their fixed portion of the interval into a heterozygous region (Figure 5A). The  
181 offsprings of these new genotypes (named i-52D7 and i-8F10BH2) did not show any  
182 segregation bias, whereas their siblings heterozygous along the whole interval did (Figure 5  
183 Source Data 2). This indicated that the parts of the PK3 interval that were heterozygous in 52D7  
184 and in 8F10BH2 both contained elements necessary for the PK activity. We thus segmented the  
185 PK3 locus into three genetic intervals, named PK3A, PK3B and PK3C (Figure 5A), PK3A and  
186 PK3C both carrying elements necessary for a functional PK. Then, in order to evaluate the  
187 PK3B interval, we crossed fixed progenies of 23G9 and 52D7 that inherited the recombination  
188 events from their parents, and obtain a plant (23G9#15 x 52D7#7) heterozygous at both PK3A  
189 and PK3C and fixed Mr-0 at PK3B (Figure 5A). The absence of segregation bias in the selfed  
190 progeny of this plant showed that PK3B also carried an element necessary for the PK activity.



191 Therefore, each of the three parts of the PK3 interval contains at least one element required for  
192 the PK activity. On one hand, Mr-0 alleles were required at PK3A and at PK3C: these two  
193 intervals thus contain killer elements. On the other hand, when the Sha allele was absent at  
194 PK3B while PK3A and PK3C were heterozygous, the PK was no longer active, indicating that  
195 either a target element from Sha was missing, or an antidote from Mr-0 was present in all the  
196 pollen grains produced.

197

### 198 **The PK3 locus is highly variable**

199 To highlight differences between Sha and Mr-0, we sequenced the entire locus in both  
200 accessions. The overall structure of the PK3 locus in Sha was very similar to that of Col-0  
201 (Figure 6A), the main differences being the deletion of the transposable element (TE)  
202 *AT3G62455*, a 1308 bp insertion in the intron of *AT3G62460*, and an insertion of approximately  
203 1 Kb in the intergenic region between *AT3G62540* and *AT3G62550*. In contrast, the PK3 locus  
204 in Mr-0 locus was particularly complex as compared to Col-0 and Sha, showing many structural  
205 variations such as large deletions, insertions, duplications and inversions (Figure 6A). Two TEs  
206 present in Col-0, *AT3G62455* and *AT3G62520*, were missing in Mr-0. The TEs *AT3G62475*,  
207 *AT3G62480* and *AT3G62490* that are located in the PK3A region of Sha, were absent from this  
208 region in Mr-0, but its PK3B region presented a large insertion of over 20 Kb that contained  
209 several TEs including *AT3G62475*, *AT3G62480* and *AT3G62490* homologues. Nonetheless,  
210 the same protein coding genes are present in the three genotypes, even though Mr-0 has two  
211 copies of the gene *AT3G62510* and three copies of the genes *AT3G62528*, *AT3G62530* and  
212 *AT3G62540*, with one copy of *AT3G62530* and *AT3G62540* being inserted into the second  
213 intron of *AT3G62610* (Figure 6A).

214 Because the PK3 locus is highly rearranged between these three accessions, we looked at other  
215 variants of known status for the PK phenotype. The entire genomes of 10 such variants, four  
216 killers, three killed and three neutral, were *de novo* sequenced. PK3 sequence alignments  
217 revealed structural variations relative to Col-0 in all the killers (Figure 6B). On the contrary,  
218 PK3 loci of killed and neutral natural variants, excepted Bur-0, are mostly colinear with Col-0  
219 (Figure 6B). When comparing the synteny of protein coding genes at the locus between *A.*  
220 *thaliana* accessions and *A. lyrata* (Figure 7), we observed that the locus structure in Ita-0 is  
221 similar to that of *A. lyrata*. This locus structure is also found in other Brassicaceae, such  
222 *Boechera stricta* (Figure 7). In contrast, Col-0, the two other neutral accessions Blh-1 and Oy-0,  
223 and Sha have a duplication of the *A. lyrata* gene *AL5G45290*, that encodes a pentatricopeptide  
224 repeat protein (PPR), resulting in two nearly identical genes (*AT3G62470* and *AT3G62540*).



225 Five additional protein coding genes (*AT3G62499* to *AT3G62530*) compared to the *A. lyrata*  
226 and *Ita-0* sequences were found between the two PPR paralogues in these accessions. We also  
227 observed a great variability in the number of copies of all these genes according to the  
228 accessions. Compared to *Col-0*, *Blh-1*, *Oy-0* and *Sha*, where they were present once, some of  
229 them were absent in the other killed accessions *Cvi-0* and *Are-10*. On the contrary, in the killers,  
230 they have undergone a variable number of duplications, with one to four copies depending on  
231 both the genes and the accessions (Figure 7).

232 Given the complexity and diversity of the locus, no obvious candidate gene appeared for killer  
233 or target/antidote elements. For the killer elements, an additional difficulty results from the fact  
234 that two elements are necessary for the killing activity, one located in the PK3A interval and  
235 the other in the PK3C interval, thereby preventing to draw conclusions from the comparison of  
236 killer and non-killer alleles in a single interval. Moreover, the intervals PK3A, PK3B and PK3C  
237 were delimited by the mapping recombinants between *Sha* and *Mr-0*, and, due to the structural  
238 differences between the accessions, it is not possible to infer their frontiers in the other  
239 genotypes, at least for the limit between PK3A and PK3B. However, it can be noted that the  
240 locus of the neutral accession *Bur-0* is nearly identical to that of the killer *Jea*: only the copy of  
241 *AT3G62530* inserted into *AT3G62610* in the PK3C interval in all the killers is missing in *Bur-0*  
242 (Figure 7). This makes this copy, which is absent in all the non-killer alleles, a gene to be tested  
243 for killer activity, although it cannot be excluded that *Bur-0* lost its killer activity due to another  
244 polymorphism in PK3C or in its unknown PK3A killer element.

245 We thus focused on the PK3B interval, which contains either a target element in killed alleles  
246 or an antidote in killer and neutral alleles. However, comparison of the PK3B sequences did  
247 not reveal a gene specific for the killed alleles that could encode a target, nor a gene specific  
248 for the killer and neutral alleles that could encode an antidote. We therefore exploited mutants  
249 in each of the genes present in this region.

250

### 251 ***AT3G62530*, expressed in young developing pollen, encodes the antidote.**

252 *Col-0* had a neutral behaviour regarding the PK (Table 1). That means that, in a poison-antidote  
253 model, *Col-0* would carry an antidote element whose inactivation should let *Col-0* pollen  
254 unprotected against *Mr-0* killer. A hybrid between *Col-0* with an inactivated version of the  
255 antidote and *Mr-0* would then present dead pollen, and produce an F2 with a segregation bias  
256 against the *Col-0* allele at L3. In order to test the poison-antidote model, we thus used T-DNA  
257 insertion mutants available in this genetic background for the eight PK3B genes. None of the  
258 homozygous mutants (*Col<sup>mut</sup>*) was distinguishable at the phenotypic level from *Col-0* in our

259 greenhouse conditions. We crossed each Col<sup>mut</sup> with an early-flowering Mr-0 genotype carrying  
260 a KO mutation in the *FRIGIDA* gene, hereafter named *Mrfri* (see Materials and Methods). All  
261 the *Mrfri* x Col<sup>mut</sup> F1 plants exhibited only viable pollen, except the hybrid with a T-DNA  
262 insertion in *AT3G62530* (Col<sup>mut530</sup>) that presented aborted pollen (Figure 8). Then, we  
263 genotyped the F2 families at L3, which all followed the expected Mendelian proportions, with  
264 the exception of the *Mrfri* x Col<sup>mut530</sup> and *Mrfri* x Col<sup>mut499</sup> F2s. The latter presented a slightly  
265 biased segregation against the Col<sup>mut499</sup> allele, but when the *Mrfri* x Col<sup>mut499</sup> F1 was crossed as  
266 female or male parent using *Mrfri* as a tester, no mutant allele transmission bias was detected  
267 (Figure 8). In contrast, the *Mrfri* x Col<sup>mut530</sup> F2 population showed a strong bias against Col<sup>mut530</sup>  
268 homozygous genotypes, as those observed in hybrids with an active PK. We analysed the  
269 mutant allele transmission in the presence of a killer allele by crossing the *Mrfri* x Col<sup>mut530</sup> F1  
270 as female or male with *Mrfri* as a tester, and we observed a significant bias against the Col<sup>mut530</sup>  
271 allele only when it came from pollen (Figure 8). At this step, we characterized the T-DNA  
272 insertion in *AT3G62530*, we checked that it really inactivated the gene and did not induce pollen  
273 abortion nor a bias in the transmission of the mutation to the progeny of the heterozygous  
274 Col<sup>mut530</sup> mutant (Table 4). These results strongly suggested that *AT3G62530* encoded an  
275 antidote. If this is the case, the mutation in *AT3G62530* should have no effect on pollen viability  
276 nor on allele segregation in the absence of a killer allele. Indeed, no dead pollen was observed  
277 in the anthers of homozygous nor heterozygous Col<sup>mut530</sup> (Figure 8 Supplement 2), and no  
278 segregation bias against the Col<sup>mut530</sup> allele was detected in the self-progeny of the heterozygous  
279 Col<sup>mut530</sup> nor in the progeny of the Sha x Col<sup>mut530</sup> hybrid (Table 4). We concluded that the  
280 presence of a killer allele was necessary to trigger the death of Col<sup>mut530</sup> pollen. This was  
281 confirmed by crossing Col<sup>mut530</sup> with another killer accession, Ct-1: while no bias was found in  
282 the progeny of the Ct-1 x Col-0 hybrid, a bias against the Col<sup>mut530</sup> allele was observed in the  
283 progeny of Ct-1 x Col<sup>mut530</sup> (Table 4), which was very similar to the bias against the Sha allele  
284 observed in the progeny of the Ct-1 x Sha cross.

**Table 4: Segregation at L3 in F2s where the Col<sup>mut530</sup> allele is confronted to a killed (Sha), neutral (Col-0) or killer (Ct-1) allele**

| Genotype                                                 | Number of plants          |     |                       |       | $p \chi^2 (1:2:1)$         | $f \text{Col}^{\text{mut530}} (4)$ |
|----------------------------------------------------------|---------------------------|-----|-----------------------|-------|----------------------------|------------------------------------|
|                                                          | not Col <sup>mut530</sup> | Hz  | Col <sup>mut530</sup> | Total |                            |                                    |
| F2 (Sha x Col <sup>mut530</sup> ) <sup>(1)</sup>         | 46                        | 101 | 37                    | 184   | 0.3 <sup>NS</sup>          | 0.20                               |
| heterozygote Col <sup>mut530</sup> /Col-0 <sup>(2)</sup> | 49                        | 85  | 46                    | 180   | 0.5 <sup>NS</sup>          | 0.26                               |
| F2 (Ct-1 x Col <sup>mut530</sup> ) <sup>(3)</sup>        | 74                        | 89  | 21                    | 184   | 2 $10^{-7}$ <sup>***</sup> | 0.11                               |

285  
 286 <sup>(1)</sup> genotyped with marker M1. <sup>(2)</sup> genotyped with PCR primers used to characterise the mutant  
 287 (Figure 8 Supplement 2). <sup>(3)</sup> The progeny of the F1 (Ct-1 x Col-0) presents no TRD (Table 4  
 288 Supplement 1). <sup>(4)</sup> frequency of Col<sup>mut530</sup> homozygotes (expected frequency 0.25). \*\*\* p<  
 289 0.001; NS, not significant.  
 290

291 In the frame of the poison-antidote model, the antidote must be expressed in cells that need to  
 292 be protected from the poison elements, in particular in developing pollen. Indeed, RT-PCR  
 293 assays showed that *AT3G62530*, in addition to being expressed in leaves, is expressed in  
 294 microspores (young developing pollen, before the first pollen mitosis, Figure 4) from plants  
 295 either Col-0, Sha or Mr-0 at the locus (Figure 8). In addition, *AT3G62530* seems one of the  
 296 most expressed gene in microspores amongst those of the PK3B interval, in the three genotypes.  
 297 All together, the above results fit perfectly with a poison-antidote system where *AT3G62530*  
 298 codes the antidote, Col-0 and Mr-0 carrying functional forms of the antidote while Sha has a  
 299 non-functional antidote allele. We named the gene *APOK3*, for *ANTIDOTE OF POLLEN*  
 300 *KILLER ON CHROMOSOME 3*.

301  
 302 ***APOK3* encodes a chimeric protein addressed to mitochondria**

303 Because *APOK3* is expressed at similar levels in microspores carrying the Sha allele, not  
 304 protected by an antidote, and microspores carrying Col-0 or Mr-0 alleles, which must harbor  
 305 an active antidote (Figure 8), we hypothesized that the allelic differences for antidote activity  
 306 are due to differences at the protein level.

307 In Col-0, *APOK3* encodes a protein of 221 amino acids, belonging to the ARM-repeat  
 308 superfamily (<https://www.arabidopsis.org/>), defined by the presence of tandem repeats  
 309 generally forming alpha-helices (<https://supfam.org/>). Further analysis of structural domains  
 310 identified three HEAT repeat domains (Figure 9A). Different parts of *APOK3* are very similar  
 311 to parts of proteins encoded by the genes *AT3G62460* (98% identity on residues 1 to 44),  
 312 *AT3G43260* (66% identity and 73% similarity on residues 43 to 142) and *AT3G58180* (57%  
 313 identity and 78% similarity on residues 81 to 221) (Figure 9B). These three genes are located

314 on the chromosome 3, and it is interesting to note that *AT3G62460* is in the PK3A interval.  
315 *AT3G43260* and *AT3G58180* are both annotated as related to deoxyhypusine hydroxylases of  
316 other organisms, but a close examination showed that the genuine Col-0 deoxyhypusine  
317 hydroxylase is encoded by *AT3G58180* (Figure 9 Supplement 1). The part of the *AT3G62460*  
318 protein shared by *APOK3* includes a mitochondria-targeting peptide (Figure 9A), suggesting  
319 that *APOK3* is addressed to mitochondria. Indeed, *APOK3* has been repeatedly found in *A.*  
320 *thaliana* mitochondrial proteomes (Heazlewood et al. 2004; Klodmann et al. 2011; Taylor et al.  
321 2011; Konig et al. 2014; Senkler et al. 2017). We therefore hypothesized that, if the antidote  
322 acts in the mitochondria, the strength of the bias due to the PK could be influenced by the  
323 mother plant cytoplasmic background. As a first insight in this direction, we compared the  
324 segregation distortion in the progenies of plants heterozygous Sha/Mr-0 at PK3 differing only  
325 by their cytoplasmic backgrounds, and we observed that the bias was stronger in the Sha than  
326 in the Mr-0 cytoplasmic background (Figure 9C). We concluded that the antidote function of  
327 *APOK3* is likely to be sensitive to variation in the mitochondrial genome.

328

### 329 ***APOK3* has undergone several duplication events within killer PK3 loci**

330 Mr-0 has two strictly identical copies of *APOK3* in the PK3B interval, which have the same  
331 structure as Col-0 and Sha genes. Mr-0 also has a third copy inserted with other sequences in  
332 the intron of *AT3G62610* in the PK3C interval (Figure 10A), but the N-terminal part of this  
333 copy differs from that of the other two and is not homologous to *AT3G62460*, which suggests  
334 that this copy is functionally different from the others; it was thus named *APOK3-like*.

335 Our analysis of the natural variation at the PK3 locus revealed that all the killers analysed have  
336 multiple copies of *APOK3* (in yellow on Figure 7), with Mr-0 and Ct-1 having two copies, and  
337 Cant-1, Jea and Shigu-2 having three copies each. In addition, these five accessions have an  
338 *APOK3-like* copy inserted in *AT3G62610*. Bur-0, which has a neutral behavior, also possesses  
339 three copies of *APOK3*, but no *APOK3-like*, even if it has an insertion of *AT3G62540* in the  
340 intron of *AT3G62610*. The other neutral accessions and the killed ones have only one copy of  
341 *APOK3*, except Ita-0, in which no copy exists at the locus (Figure 7). No other copy of *APOK3*  
342 was found elsewhere in the Ita-0 genome, neither by searching in the genomic sequence nor by  
343 PCR amplification in Ita-0 genomic DNA. Similarly, we did not find any gene encoding a  
344 protein closer to *APOK3* than to *AT3G58180* neither in *A. lyrata* nor in other Brassicaceae  
345 sequences available in the databases. Altogether, these results suggest that *APOK3* is specific  
346 to *A. thaliana* and has evolved within the species.

347

348 **Antidote and non-antidote forms of APOK3 differ by three amino acids**

349 In order to further explore the sequence variation of *APOK3* in relation with its antidote activity,  
350 we amplified and sequenced *APOK3* in all the accessions whose behavior for the PK3 had been  
351 determined (Table 1). The *APOK3* copies found in each killer accession whose genome was *de*  
352 *novo* sequenced were identical. In Etna-0, the only killer accession for which no genomic  
353 sequence was available, we obtained a unique Sanger sequence for *APOK3*, indicating that,  
354 whatever the number of copies it has, they are identical. Phylogenetic analysis clustered the  
355 sequences into three clades, one grouping all copies found in accessions possessing the antidote,  
356 *i.e.* killer and neutral. A second cluster groups most of copies from the killed accessions, with  
357 the exception of Are-1, Are-10 and Kas-2 which branch together as a third clade (Figure 10B).  
358 We identified 11 different *APOK3* haplotypes, five from non-killed accessions and six from  
359 killed accessions (Table 5). One polymorphism located 36 pb upstream of the ATG start codon  
360 and three non-synonymous SNPs in the coding sequence distinguished non-killed from killed  
361 alleles. Consequently, the *APOK3* proteins with an antidote activity differ from those with no  
362 antidote activity by the three amino acid changes C85S, V101D and C105R (Table 5).  
363 Interestingly, the last two of these amino acids are located in the first HEAT-repeat domain of  
364 the protein, suggesting these changes could modify the protein interactions and could make it  
365 functional or non-functional as an antidote.

366  
367

**Table 5: APOK3 haplotype diversity among 27 accessions of known status for PK3**

|                            |                                                  | SNP position <sup>(2)</sup> |   |    |    |    |    |     |     |     |            |     |     |     |            |     |            |     |     |     |     |   |
|----------------------------|--------------------------------------------------|-----------------------------|---|----|----|----|----|-----|-----|-----|------------|-----|-----|-----|------------|-----|------------|-----|-----|-----|-----|---|
| Accessions <sup>(1)</sup>  |                                                  | -36                         | 6 | 17 | 27 | 56 | 68 | 152 | 241 | 248 | <b>253</b> | 332 | 341 | 363 | <b>373</b> | 378 | <b>384</b> | 415 | 583 | 765 | 840 |   |
| antidotes                  | <b>Col-0, Shigu-2, Oy-0, Blh-1, N16, Koch-1</b>  | <b>c</b>                    | T | T  | T  | T  | C  | T   | G   | A   | <b>A</b>   | a   | t   | A   | <b>A</b>   | T   | <b>C</b>   | G   | G   | t   | T   |   |
|                            | <b>Mr-0, Etna-2</b>                              | .                           | . | .  | .  | .  | .  | .   | T   | .   | .          | .   | .   | .   | .          | .   | .          | .   | .   | .   | .   |   |
|                            | <b>Ct-1</b>                                      | .                           | . | .  | .  | .  | .  | .   | .   | .   | .          | .   | .   | T   | .          | .   | .          | .   | .   | .   | g   | . |
|                            | <b>Bur-0 APOK3-1 &amp; 2</b>                     | .                           | . | .  | .  | .  | .  | .   | .   | .   | .          | .   | .   | .   | .          | .   | .          | .   | .   | C   | g   | . |
|                            | <b>Jea, Cant-1, Bur-0 APOK3-3, Lov-5</b>         | .                           | . | .  | .  | .  | .  | .   | .   | .   | .          | .   | .   | .   | .          | .   | .          | .   | .   | .   | .   | g |
| non-antidotes              | <b>Cvi-0, N13, Kly-1, Nov-01, Zal-3, Stepn-1</b> | <b>t</b>                    | . | .  | .  | .  | .  | .   | .   | .   | <b>T</b>   | .   | .   | .   | <b>T</b>   | .   | <b>T</b>   | .   | .   | .   | g   | . |
|                            | <b>Kidr-1</b>                                    | <b>t</b>                    | . | .  | .  | .  | .  | .   | .   | .   | <b>T</b>   | .   | c   | .   | <b>T</b>   | .   | <b>T</b>   | .   | .   | .   | g   | . |
|                            | <b>Sorbo, Kz-1, Rak-2</b>                        | <b>t</b>                    | . | .  | .  | .  | .  | A   | .   | .   | <b>T</b>   | .   | .   | .   | <b>T</b>   | .   | <b>T</b>   | T   | .   | .   | g   | . |
|                            | <b>Sha</b>                                       | <b>t</b>                    | . | .  | .  | .  | A  | A   | .   | .   | <b>T</b>   | .   | .   | .   | <b>T</b>   | .   | <b>T</b>   | T   | .   | .   | g   | . |
|                            | <b>Kas-2</b>                                     | <b>t</b>                    | . | .  | .  | C  | .  | .   | .   | C   | <b>T</b>   | .   | .   | .   | <b>T</b>   | G   | <b>T</b>   | .   | .   | .   | g   | G |
|                            | <b>Are-10, Are-1</b>                             | <b>g</b>                    | C | G  | C  | .  | .  | .   | .   | C   | <b>T</b>   | g   | .   | .   | <b>T</b>   | G   | <b>T</b>   | .   | .   | .   | g   | . |
| Amino acid change position |                                                  |                             |   | 6  |    | 19 | 23 | 51  | 81  | 83  | <b>85</b>  |     |     | 98  | <b>101</b> | 103 | <b>105</b> | 115 | 141 |     |     |   |
| antidote                   |                                                  |                             |   | F  |    | L  | S  | V   | A   | N   | <b>S</b>   |     |     | T   | <b>D</b>   | Y   | <b>R</b>   | G   | V   |     |     |   |
| non-antidote               |                                                  |                             |   | C  |    | S  | Y  | D   | S   | T   | <b>C</b>   |     |     | S   | <b>V</b>   | D   | <b>C</b>   | V   | L   |     |     |   |

368  
369  
370  
371  
372  
373

<sup>(1)</sup> The names of the accessions whose entire PK3 sequences are known are in bold. The Col-0 sequence (TAIR 10) is used as reference. <sup>(2)</sup> Base 1 of the nucleotide sequence is the A of the start codon of the protein. The nucleotides in the exons are in upper case and those in the untranslated regions in lower case. Nucleotides identical to the reference sequence are represented as dots. Multiple sequence alignment was done with ClustalW (<https://www.genome.jp/tools-bin/clustalw>). SNPs and amino acids specific of antidote vs non-antidote forms are in bold.



## 374 Discussion

375 As pointed out by Burga et al (2020), the discovery of poison-antidote systems in eukaryotes is  
376 most often fortuitous, especially because nearly all these systems are species specific. In *A.*  
377 *thaliana* too, we found PKs adventitiously when looking at a hybrid male sterility, of which  
378 PKs turned out to be unexpected components, in a cross between Sha and Mr-0 natural variants  
379 (Gobron et al. 2013; Simon et al. 2016). In this study, we focused on one of these PKs,  
380 responsible for a deficit in Sha homozygotes at the bottom of chromosome 3 in Mr-0/Sha hybrid  
381 progenies, due to the death of pollen grains carrying this allele. A TRD at the same locus was  
382 found in the progenies of 19 out of 44 hybrids involving either Sha or Mr-0 as one of the parents,  
383 indicating that killed or killer alleles are not rare in *A. thaliana* (Table 1). This is in agreement  
384 with the report by Seymour et al (2019) of frequent TRD in F2 populations from 80 *A. thaliana*  
385 founders, although these authors captured all types of segregation distorters, using a genome  
386 wide detection approach. Indeed, F2 distortion at one locus can result from allelic interactions  
387 either at the same locus or between different loci (Fishman and McIntosh 2019). We cannot  
388 formally exclude that some of the biases observed in our F2 families are partially caused by  
389 other allelic interactions than the PK3 studied here. However, our subsequent results on  
390 sequence variation in the antidote gene *APOK3*, which grouped antidote and non-antidote forms  
391 of the genes in distinct clades (Figure 10B), support our conclusion that we indeed detected the  
392 effect of PK3 in these crosses. In addition, in biased F2 populations, most killer:Hz ratios  
393 complied with the 1:1 ratio that is expected for a bias due to a gametophytic defect controlled  
394 by a single locus. The exceptions concerned the accessions Kas-2, Kly-1, N13 and Cvi-0 in  
395 crosses with Mr-0, for which F2 genotypes presented an excess in heterozygotes (>55%). These  
396 cases could be explained by the presence, at loci partially linked to the PK3, of other segregation  
397 distorters that affect the transmission of the Mr-0 allele.

398 Our cytological analyses showed that, in ShaL3<sup>H</sup> plants, a defect of pollen development is  
399 visible as soon as the bicellular stage (Figure 4). The proportion of affected pollen then  
400 increases during development but reaches only approximately 35% of dead pollen in mature  
401 anthers instead of 50% expected if the killer effect was total. This incomplete penetrance of the  
402 killer effect is supported by the fact that plants homozygous for the killed allele are found in  
403 the progeny of heterozygotes. Indeed, if considering that all the 35% dead pollen carry a Sha  
404 allele, we theoretically expect 11,5% of Sha homozygotes in the progeny, which is very close  
405 to the 10% observed (Table 2). Incomplete penetrance was also observed in other reported  
406 gamete killers and meiotic drivers, for example in tomato (Rick 1966) or rice (Matsubara et al.

407 2011). In some cases, as in distorters from *Drosophila* (Larracuenta and Presgraves 2012), rice  
408 (Koide et al. 2012) and yellow monkeyflower (Finseth et al. 2021), the incomplete penetrance  
409 of the phenotype was due to the presence of unlinked modifier loci that modulate the strength  
410 of the distorter. In this regard, it is interesting to note that the strength of the biases that we  
411 observed in the F<sub>2</sub>s vary between crosses, either with Sha or with Mr-0 (Table 1 Source Data 1  
412 & 2). It is conceivable that this variation be due to the presence, in some hybrids, of unlinked  
413 epistatic loci involved in the sterility caused by PK3, even if in the case of Mr-0/Sha we  
414 observed no difference in the biases between plants with Sha and Mr-0 fixed nuclear  
415 backgrounds (Table 2). In contrast, changing the Mr-0 cytoplasmic background to the Sha one  
416 had a strong effect on the elimination of the Sha allele in pollen (Figure 9C), making it almost  
417 absolute (only one Sha homozygous plant among 512 progenies). Considering that *APOK3* is  
418 a protein targeted to mitochondria, it is tempting to hypothesize that variations in the  
419 mitochondrial genome can modulate pollen sensitivity to the killer. In this case, the  
420 mitochondrial genome could be considered as a 'modifier locus' of the PK. Interestingly, the  
421 antidote of the rice *qHMS7* locus is also addressed to mitochondria (Yu et al. 2018) but the  
422 effect of the cytoplasmic background was not explored. To date, however, there is no indication  
423 that these poison-antidote systems from rice and *Arabidopsis* have functional similarities.

424 Our diversity survey revealed that some natural variants are neutral for the PK activity. Neutral  
425 alleles have been reported not only for gamete killers in rice (Koide et al. 2018; Yu et al. 2016;  
426 Wang et al. 2005; Liu et al. 2011) and tomato (Rick 1971), but also for spore killers in fungi  
427 such as *Neurospora* (Turner 2001) and for the meiotic driver *wtf* in fission yeast (Nuckolls et  
428 al. 2017). We took advantage of the neutral behavior of Col-0 to exploit available mutants  
429 affected in each of the protein coding genes present in the interval that contains the sensitivity  
430 factor of the PK. This allowed us to establish that the PK3 functions as a poison-antidote system  
431 and to identify the gene encoding the antidote, *APOK3*, as *AT3G62530*. Inactivation of *APOK3*  
432 in the neutral Col-0 allele turned it sensitive to a killer allele, as exemplified in hybrids with  
433 Mr-0 (Figure 8) and Ct-1 (Table 4), whereas hybrids with Col-0 or Sha had fully viable pollen  
434 and did not show any segregation distortion at the locus in their progenies (Table 4). These  
435 results demonstrate that the Col-0 allele of *APOK3* protects pollen from the effect of killer  
436 alleles in hybrids, which is the definition of an antidote. In addition, three residues in the protein  
437 sequence and one SNP in the 5'-UTR are strictly associated with the antidote forms of the gene  
438 (Table 5), suggesting their involvement in its protective activity.

439 *APOK3* molecular function still remains to be elucidated. It is annotated belonging to the  
440 ARM-repeat superfamily, which mediate numerous cellular processes including signal

441 transduction, cytoskeletal regulation, nuclear import, transcriptional regulation and  
442 ubiquitination (Samuel et al. 2006). The remarkable features of this protein are its interacting  
443 domains, its mitochondrial location and its chimeric structure. APOK3 has three HEAT repeat  
444 domains (Figure 9A), predicted to form super-helices (Andrade and Bork 1995) and to mediate  
445 protein-protein interactions (Andrade et al. 2001). More specific investigations will be needed  
446 to determine if these domains are involved in interactions with other mitochondrial proteins. In  
447 this context, it is interesting to note that APOK3 was reported to associate with ISOCITRATE  
448 DEHYDROGENASE 1, a regulatory subunit of NAD<sup>+</sup>- dependent enzyme of the tricarboxylic  
449 acid cycle (TCA), and SUCCINATE DEHYDROGENASE 4, a subunit of the mitochondrial  
450 respiratory complex II, in a study exploring the protein-protein interaction network of the plant  
451 TCA cycle (Zhang et al. 2018). To date, the relevance to APOK3 function of its ability to bind  
452 zinc bivalent ions, reported by Tan et al. (Tan et al. 2010) is difficult to assess. However, these  
453 indications make excellent entry points to functional studies aiming at discovering how APOK3  
454 fulfills its antidote activity. Indeed, this question has been elucidated in only very few systems,  
455 among which the *wtf* spore killer of fission yeast in which the antidote was shown to co-  
456 assemble with the corresponding poison and address the toxic aggregates to sequestering  
457 vacuoles (Nuckolls et al. 2020). Interestingly, these authors also found that genes involved in  
458 the mitochondrial functioning counteract the poison activity, suggesting a role, yet to be  
459 uncovered, of mitochondria in this antidote mechanism. From our results, it seems that APOK3  
460 has no other biological role than being the antidote for PK3. In Col-0 the *apok3* KO mutation  
461 did not reveal any obvious phenotype alterations, at least in our laboratory standard conditions.  
462 Moreover, *APOK3* is missing in the Moroccan accession Ita-0. This supports that *APOK3* is  
463 not essential to *A. thaliana*. In addition to be absent in Ita-0, which belongs to an ancient lineage  
464 of *A. thaliana* (Arabidopsis Genome Consortium 2016; Durvasula et al. 2017), *APOK3* has no  
465 ortholog in the *A. thaliana* closest relative *A. lyrata* (Figure 7) and was not found in the available  
466 Brassicaceae sequences. This argues for this gene being specific to the *A. thaliana* species. It is  
467 thus likely that *APOK3* originated after *A. thaliana* divergence from its common ancestor with  
468 *A. lyrata*. The gene structure suggests that *APOK3* originated from a duplication of a member  
469 of the *AT3G43260* and *AT3G58180* gene family, followed by the recruitment of the *AT3G62460*  
470 mitochondrial targeting sequence. In *Oryza sativa* ssp *japonica*, a comparative genome analysis  
471 detected 28 new *O. sativa* specific genes on chromosome 3, and 14 of which were found to be  
472 chimerical (Zhang et al. 2013). However, as far as we are aware, their biological functions  
473 remain unknown. Because of the absence of *APOK3* in any related species, we could not  
474 conclusively infer whether non-antidote forms preceded antidote ones or rather derived from

475 them. However, because *A. thaliana* Madeiran strains such as Are-1 and Are-10 have been  
476 described as archaic (Fulgione et al. 2018), our phylogenetic analysis of *APOK3* (Figure 10B)  
477 suggests that antidote forms evolved more recently. This would be an interesting question to  
478 address in order to understand the evolutionary trajectory of the gene in relation to its antidote  
479 function. Indeed, poison-antidote systems are often considered as selfish genetic elements, but  
480 their selfish nature is not always easy to properly establish, requiring thorough population and  
481 evolutionary genetic studies not amenable in all cases (Sweigart et al. 2019). In the present case,  
482 the question is still open, and deserves to be treated. It would involve the exploration of *APOK3*  
483 sequence diversity in a wider sampling of natural variants, in particular in polymorphic *A.*  
484 *thaliana* natural populations. The examination of the organization and gene content of 11  
485 genotypes of different PK3 status in addition to Col-0, Sha and Mr-0 provide interesting  
486 information, though, revealing the strikingly complex and variable structure of the PK3 locus  
487 in particular in killer alleles. In eukaryotes, poison-antidote elements are generally found within  
488 regions of high divergence and structural variation (Burga et al. 2020). These are regions with  
489 low recombination (Larracuente and Presgraves 2012), which could favor the poison-antidote  
490 system. Indeed, the antidote must be inherited together with the killer. In our case, the structural  
491 differences between Sha and Mr-0 alleles easily explain the scarcity of recombinants found  
492 inside the PK3 interval during the fine-mapping of the locus. The use of these rare recombinants  
493 and of derived crosses allowed us to establish that the PK3 contains at least three genetic  
494 elements necessary for the PK activity (Figure 5), the antidote being flanked by two intervals  
495 each carrying elements necessary for the killer activity. Poison-antidote systems whose genetic  
496 factors have been identified so far in eukaryotes other than fungi most commonly involve two  
497 components (Burga et al. 2020). However, in plants, three components poison-antidote systems  
498 have been previously described in rice distorter loci. In rice S1 (Xie et al. 2019), three linked  
499 genes are necessary for toxicity; in rice S5 (Yang et al. 2012), two sporophytic factors are  
500 necessary for the killer activity but they are not carried by the same allele. From our mapping  
501 results, we cannot completely exclude that PK3A or PK3C also carry rescue activities not  
502 redundant with PK3B, nor that PK3B also carries killer activity not redundant with PK3A and  
503 PK3C. However, it is noticeable that this structure prevents the killer activity to be isolated  
504 from the antidote by a recombination event, since such an event would also separate the two  
505 mandatory killer elements.

506 The PK3 locus is particularly dynamic and prone to structural variations. Besides the Ita-0 allele  
507 that is structurally similar to that of *A. lyrata*, with orthologous genes in the same order and  
508 orientation (Figure 7), the other killed and the neutral alleles (excepted Bur-0) present the same

509 organization of the locus (Figure 6B), even if some protein coding genes are missing in Are-10  
510 and Cvi-0 (Figure 7). Among the neutral alleles, Bur-0 is an interesting exception: it resembles  
511 a killer both in structure (Figure 6B) and gene content (Figure 7), and we hypothesize it evolved  
512 from a killer allele that lost its killing capacity. Comparison of the Bur-0 sequence with the very  
513 similar allele of Jea will probably help identifying killer elements of PK3. The most complex  
514 alleles are found in killers (Figure 6B), which are highly variable, with different groups of genes  
515 duplicated in one or the other orientation and in different relative positions (Figure 7). Having  
516 more than one copy of *APOK3* is one remarkable common feature of the killer alleles. It is  
517 likely that having multiple copies is important for killer alleles not to be the victims of their  
518 own activity. Gene dosage has also been reported to be critical in a poison-antidote system in  
519 *C. elegans* (Mani and Fay 2009). In addition, the different copies of *APOK3* found in each killer  
520 are identical, but may be slightly different between accessions, indicating that recent  
521 duplications occurred independently in the lineages of the different variants we examined.  
522 These results suggest that these alleles have experienced a more intense structural evolution  
523 than neutral and killed ones, and raises the questions of the mechanisms and evolutive forces  
524 leading to these structures. The presence of several transposable elements at the locus, and their  
525 variation in occurrence between Sha, Mr-0 and Col-0 (Figure 6A) could be relevant to this  
526 question, since TE mobility is a main source of genetic variation in *A. thaliana* (Baduel et al.  
527 2021). It has also been suggested that the proximity of transposons has facilitated duplication  
528 of the fission yeast *wtf* genes (Eickbush et al. 2019).  
529 Even if gamete killers likely exist in all plant species, none had been investigated in *A. thaliana*  
530 until now, to our knowledge. The PK we dissected here has some general features of eukaryotic  
531 poison-antidote systems, including its species-specific nature and its presence within a hyper  
532 variable locus. The layout of the killer alleles is particular, with at least three mandatory  
533 elements and diverse duplications of sequence blocks that contain antidote genes trapped  
534 between killer elements. Continuing to exploit the natural variation of the species should help  
535 identifying the killer elements, and provide clues towards the underlying mechanisms  
536 responsible for the PK activity, the role of the mitochondria, and eventually the forces driving  
537 the evolution of the locus.

538

539

## 540 **Materials and Methods**

### 541 **Plant material and growth conditions**



542 *A. thaliana* natural accessions were provided by the Versailles Arabidopsis Stock Center  
543 (<http://publiclines.versailles.inrae.fr/>) and T-DNA lines were provided by the NASC  
544 (<http://arabidopsis.info/>).

545 In the analysis of the Sha/Mr bias at L3, all the genotypes used had the Mr-0 cytoplasm, unless  
546 specified. The ShaL3<sup>H</sup> genotype was previously designated [Mr]ShaL3<sup>H</sup> (Simon et al. 2016). It  
547 has the Mr-0 cytoplasmic genomes and a Sha nuclear background except at L3, *i.e.* between  
548 markers M1 and M15 (Figure 5 Source Data 3), where it is heterozygous. Here we constructed  
549 the MrL3<sup>H</sup> genotype by backcrossing the (Mr-0 x Sha) F1 by Mr-0 three times. We selected a  
550 third backcross progeny heterozygous at L3, and at the loci L1 and L5 previously described in  
551 Simon et al (2016) and we chose in its self-descent a plant homozygous Mr-0 at L1 and L5  
552 while heterozygous from the marker M0 (Figure 5 Source Data 3) to the bottom of chromosome  
553 3, which we called MrL3<sup>H</sup>.

554 In order to save time, we constructed an early-flowering version of Mr-0 by inactivating  
555 *FRIGIDA* (*AT4G00650*) by CrispR-Cas9 (Doudna and Charpentier 2014). We cloned two  
556 guide-RNAs (275rev and 981forw, Supplemental File 1) in a pDe-Cas9-DsRed binary vector  
557 (Morineau et al. 2016) and introduced this construct by floral dipping (Clough and Bent 1998)  
558 in Mr-0 plants. We isolated several T1 transformants, some of them flowering earlier than Mr-  
559 0. After segregating out the T-DNA, we selected one T2 plant homozygous for a stop mutation  
560 in the *FRIGIDA* first exon. This early version of Mr-0, called *Mrfri*, flowers 39 days after  
561 sowing in our greenhouse conditions. *Mrfri* produces viable pollen, whereas its cross with Sha  
562 induces pollen lethality, as does Mr-0 (Figure 8 Supplement 1). As expected, it results in a  
563 segregation distortion against Sha alleles at L3 in the progeny of *Mrfri* x Sha plants.

564 Plants were grown in the greenhouse under long-day conditions (16h day, 8h night) with  
565 additional artificial light (105  $\mu$ E/m<sup>2</sup>/sec) when necessary.

### 566 **Cytological analyses**

567 DAPI staining of spread male meiotic chromosomes was performed according to (Ross et al.  
568 1996). All stages were observed in 3 independent ShaL3<sup>H</sup> plants and in parental controls.  
569 Observations were made using a Zeiss Axio Imager2 microscope and photographs were taken  
570 using an AxioCam MRm (Zeiss) camera. Propidium iodide and Alexander staining (Alexander  
571 1969) of pollen were performed as described in Durand et al (2021).

### 572 **Fine-mapping and genotyping**

573 DNA extractions were conducted on leaves from seedlings as described by Loudet et al (2002).  
574 Markers for the fine-mapping are described in Figure 5 Source Data 1. For CAPS markers M3  
575 and M12 we used Cac8I (NEB) and Bsp1407I (ThermoFisher) restriction enzymes,



576 respectively. Other SNPs were genotyped by sequencing. For the fine-mapping of PK3, we  
577 genotyped a total of 4,717 plants and identified 42 recombinants between markers M1 and M15.  
578 We selected 23 informative recombinants that were tested for segregation distortion at the locus  
579 by genotyping their self-descent progenies with appropriate markers (Figure 5 Source Data 1).  
580 All the other primers used in this work for mutant characterization, gene expression, PCR  
581 amplification and DNA sequencing are listed in Supplemental File 1.

### 582 **Purification of microspores**

583 This step was carried out at the Imagerie-Gif facility (<https://www.i2bc.paris-saclay.fr>).  
584 Microspores were isolated from flower buds by chopping with a razor blade in 0.1M Mannitol.  
585 The crude suspension was filtered through a 50- $\mu$ m nylon mesh (Sysmex-Partec) and collected  
586 in polypropylene tubes at 4°C. Microspores were sorted by flow cytometry using a MoFlo  
587 Astrios\_EQ© cytometer (Beckman Coulter, Roissy, France) in PuraFlow sheath fluid  
588 (Beckman Coulter) at 25 psi (pounds per square inch), with a 100-micron nozzle. We performed  
589 sorting with ~43 kHz drop drive frequency, plates voltage of 4000-4500 V and an amplitude of  
590 30-50 V. Sorting was performed in purity mode. The 488-SSC (Side Scatter) parameter was set  
591 as threshold. Microspores gate was first set on FITC-A (526/50 band-pass for autofluorescence)  
592 versus SSC plot. Then, only low Forward Scatter (FSC) events were kept. The singlet gate was  
593 established using autofluorescence parameters. Accuracy of gating was determined post-sorting  
594 using microscopy with transmitted light and 40X dry. The flow cytometer-sorted microspores  
595 (300k) were collected in 1.5-ml tubes containing 300  $\mu$ L Trireagent® and conserved at -80°C  
596 until subsequent RNA extraction.

### 597 **RNA extractions and RT-PCR**

598 We mixed on ice 500  $\mu$ l of microspore suspension in TriReagent with 300  $\mu$ l glass beads  
599 (Sigma, G8772-100G glass beads acid washed) and two sterilized metals beads (3mm  
600 diameter). The tubes were shaken 2 x 2,5 min at a 1/30 frequency in a Retsch MM400 mixer  
601 mill and the solution without beads was recovered in a new RNase-free tube by making a small  
602 hole at the bottom of the tube and centrifuging 2 min at 3,900 rpm at 4°C. The beads were  
603 rinsed with 500  $\mu$ l of TRIreagent and centrifuged again. The eluate was centrifuged 2min at  
604 11,000 rpm, 4°C to remove cellular debris. RNA was extracted using the extraction RNA kit  
605 (Zymo research). Leaf RNA was prepared as above except that leaves were grinded in Trizol  
606 with one metal bead.

607 Reverse transcription was proceeded with 200 ng of purified RNA using the Maxima reverse  
608 transcriptase (Thermo Scientific) primed with oligodT in 50  $\mu$ L. After heat inactivation of the  
609 RT, 2  $\mu$ L of cDNA were used for each PCR.

#### 610 **Sanger sequencing and annotation of Sha and Mr-0 PK3 locus**

611 PCR and sequencing primers are listed in Supplemental File 1. Amplification products were  
612 sequenced by Beckman Coulter Genomics (<http://www.beckmangenomics.com>). Sequences  
613 were processed and aligned with Codon Code Aligner V5.0.2  
614 (<http://www.codoncode.com/aligner/>). For Mr-0, because of the complexity of the locus, a  
615 fosmid library was built using the "Copycontrol fosmid library production kit" with  
616 pCC2FOS<sup>TM</sup> vector and T1 EPI300<sup>TM</sup> *E. coli* strain (Illumina technologies). The library titled  
617 7.600 cfu/mL with an average size of inserts of 35 Kb. Purification of fosmid DNA was  
618 performed using the FosmidMax DNA purification kit<sup>TM</sup> (Illumina technologies).

619 The transfer of structural and functional annotation from the Col-0 reference genome to Sha  
620 and Mr-0 was done with the EGN-EP transfer pipeline (Sallet et al. 2019). These annotations  
621 were manually corrected, especially in Mr-0, to take into account copy number variations. TE  
622 annotation was performed with the TEannot tool (Quesneville et al. 2005),  
623 <http://urgi.versailles.inra.fr/>) and hits of more than 1 Kb were retained.

#### 624 **De novo genome sequencing, assembly and annotation**

625 High molecular weight DNA was extracted from 3 week-old plantlets using a protocol modified  
626 from Mayjonade et al (2016) which is described on Protocols.io (Russo et al. 2021). The  
627 following library preparation and sequencing were performed at the GeT-PlaGe core facility,  
628 INRAE Toulouse.

629 Nanopore sequencing: ONT libraries were prepared using the EXP-NBD103 and SQK-LSK109  
630 kits according to the manufacturer's instructions and using 4  $\mu$ g of 40Kb sheared DNA  
631 (Megaruptor, Diagenode) as input. Pools of six samples were sequenced on one R9.4.1 flowcell.  
632 Between 0.014 and 0.020 pmol of library were loaded on each flowcell and sequenced on a  
633 PromethION instrument for 72 hours.

634 Illumina sequencing: Illumina libraries were prepared using the Illumina TruSeq Nano DNA  
635 HT Library Prep Kit according to the manufacturer's instructions. Libraries were then sequenced  
636 with 2x150bp paired-end reads on an Hiseq3000 instrument (Illumina).

637 Nanopore sequence datasets ranging from 4Gb to 14Gb with a minimum N50 of 22Kb were  
638 assembled with CANU (Koren et al. 2017) software release 1.9 (genomeSize=125M  
639 parameter). Mitochondrion and chloroplast genomes were assembled with CANU after  
640 selection of previously corrected CANU reads longer than 40Kb mapped with minimap2 (Li

641 2018) (-x asm5) on a databank built with Col-0 chloroplast and Col-0 and Landsberg  
642 mitochondrion genomes (NCBI accessions: NC\_000932, NC\_037304, JF729202). Spurious  
643 contigs were identified with minimap2 (-x asm5) and removed from the raw CANU assemblies.  
644 A spurious contig was defined as either a contig mapped on mitochondrion or chloroplast  
645 genomes or a contig mapped on a larger contig with a hit spanning at least 80% of its length.  
646 Nuclear contigs were scaffolded with AllMaps (Tang et al. 2015) using Col-0 genome as  
647 reference. Then, two rounds of consensus polishing using Illumina paired-end data were  
648 performed. For each round, the paired-end reads were first mapped with bwa (Li and Durbin  
649 2009) (0.7.17-r1188 debian) with a minimal score of 50 (-T) then pilon software (Walker et al.  
650 2014) (version 1.23) was used to generate the polished consensus sequences (--fix snps,indels  
651 --flank 20 --min-depth 20). Unanchored contigs shorter than 40kb were removed (considered as  
652 likely contaminants as very few Illumina reads were mapped on these short contigs).  
653 The genomes were annotated using the EuGène software version 4.2a via the integrative  
654 pipeline egnep (Sallet et al. 2019) version 1.6 ([http://eugene.toulouse.inra.fr/Downloads/egnep-](http://eugene.toulouse.inra.fr/Downloads/egnep-Linux-x86_64.1.6.tar.gz)  
655 [Linux-x86\\_64.1.6.tar.gz](http://eugene.toulouse.inra.fr/Downloads/egnep-Linux-x86_64.1.6.tar.gz)). In addition to standard tools for repeat masking and lncRNA  
656 prediction included in egnep, the most recent and comprehensive annotation of *A. thaliana*  
657 available was used both as training dataset and as source of evidences. The peptide database of  
658 Araport (Krishnakumar et al. 2015) version 11 (201606) was used for the similarity searches  
659 performed with NCBI-BLASTX software version 2.2.31+ (hits spanning more than 80% of the  
660 protein length were retained). The corresponding cDNA database (201606) was used as  
661 transcriptional evidences. The cDNAs were mapped with gmap (Wu and Watanabe 2005)  
662 version 2017-09-05 (hits spanning more than 30% of the transcript length at a minimum identity  
663 percentage of 94 were retained).  
664 In accessions with several copies of *APOK3*, occasional sequence errors subsist in some copies  
665 in the automatic assemblies. To correct these errors, *APOK3* was Sanger sequenced after gene  
666 amplification with the primers AT3G62530F1 and AT3G62530R1 (Supplemental File 1).

### 667 **Sequence availability**

668 Whole genome sequences and PK3 locus sequences are available at the doi listed in Figure 6  
669 Source Data 1. Start and end of the PK3 locus were determined by homology with the Col-0  
670 reference sequence.

671

672

673 **Acknowledgments**

674 We gratefully acknowledge Adeline Simon for her help in bioinformatics, Fabien Nogu e for  
675 his advices in the CrispR Cas9 mutagenesis and Filipe Borges, Nicolas Valentin and Micka el  
676 Bourge for the microspore FACS sorting. Sebastien Santini (CNRS/AMU IGS UMR7256) and  
677 the PACA Bioinfo platform (supported by IBISA) are acknowledged for the availability and  
678 management of the phylogeny.fr website. The present work has benefited from Imagerie-Gif  
679 core facility supported by l'Agence Nationale de la Recherche (ANR-11-EQPX-  
680 0029/Morphoscope, ANR-10-INBS-04/FranceBioImaging; ANR-11-IDEX-0003-02/ Saclay  
681 Plant Sciences) and from the support of IJPB Plant Observatory technological platforms. The  
682 IJPB benefits from the support of Saclay Plant Sciences-SPS (ANR-17-EUR-0007). This work  
683 was funded in part by INRAE Biology and Plant Breeding department (EVOLOX and POLLEN  
684 grants) and by the R egion Midi-Pyr en ees (CLIMARES project) and the LABEX TULIP (ANR-  
685 10-LABX-41).

686

687 **Competing interest statement**

688 We declare no competing interests.

689 References

- 690 Agorio A, Durand S, Fiume E, Brousse C, Gy I, Simon M, Anava S, Rechavi O, Loudet O,  
691 Camilleri C, Bouche N (2017) An Arabidopsis Natural Epiallele Maintained by a  
692 Feed-Forward Silencing Loop between Histone and DNA. *PLoS Genet* 13  
693 (1):e1006551. doi:10.1371/journal.pgen.1006551
- 694 Agren JA, Clark AG (2018) Selfish genetic elements. *PLoS Genet* 14 (11):e1007700.  
695 doi:10.1371/journal.pgen.1007700
- 696 Alexander MP (1969) Differential staining of aborted and nonaborted pollen. *Stain Technol*  
697 44 (3):117-122
- 698 Andrade MA, Bork P (1995) HEAT repeats in the Huntington's disease protein. *Nat Genet* 11  
699 (2):115-116. doi:10.1038/ng1095-115
- 700 Andrade MA, Petosa C, O'Donoghue SI, Muller CW, Bork P (2001) Comparison of ARM and  
701 HEAT protein repeats. *J Mol Biol* 309 (1):1-18. doi:10.1006/jmbi.2001.4624
- 702 Baduel P, Leduque B, Ignace A, Gy I, Gil J, Jr., Loudet O, Colot V, Quadrana L (2021)  
703 Genetic and environmental modulation of transposition shapes the evolutionary  
704 potential of Arabidopsis thaliana. *Genome Biol* 22 (1):138. doi:10.1186/s13059-021-  
705 02348-5
- 706 Bikard D, Patel D, Le Mette C, Giorgi V, Camilleri C, Bennett MJ, Loudet O (2009)  
707 Divergent evolution of duplicate genes leads to genetic incompatibilities within *A.*  
708 *thaliana*. *Science* 323 (5914):623-626. doi:10.1126/science.1165917
- 709 Bomblies K, Lempe J, Epple P, Warthmann N, Lanz C, Dangl JL, Weigel D (2007)  
710 Autoimmune response as a mechanism for a Dobzhansky-Muller-type incompatibility  
711 syndrome in plants. *PLoS Biol* 5 (9):e236. doi:07-PLBI-RA-1144 [pii]  
712 10.1371/journal.pbio.0050236
- 713 Bravo Nunez MA, Nuckolls NL, Zanders SE (2018) Genetic Villains: Killer Meiotic Drivers.  
714 *Trends Genet* 34 (6):424-433. doi:10.1016/j.tig.2018.02.003
- 715 Burga A, Ben-David E, Kruglyak L (2020) Toxin-Antidote Elements Across the Tree of Life.  
716 *Annu Rev Genet* 54:387-415. doi:10.1146/annurev-genet-112618-043659
- 717 Clough SJ, Bent AF (1998) Floral dip: a simplified method for Agrobacterium-mediated  
718 transformation of Arabidopsis thaliana. *Plant J* 16 (6):735-743. doi:10.1046/j.1365-  
719 313x.1998.00343.x
- 720 Consortium" AG (2016) 1,135 Genomes Reveal the Global Pattern of Polymorphism in  
721 Arabidopsis thaliana. In: *Cell*, vol 166. vol 2, 2016/06/14 edn., pp 481-491.  
722 doi:10.1016/j.cell.2016.05.063
- 723 Doudna JA, Charpentier E (2014) Genome editing. The new frontier of genome engineering  
724 with CRISPR-Cas9. *Science* 346 (6213):1258096. doi:10.1126/science.1258096
- 725 Durand S, Bouche N, Perez Strand E, Loudet O, Camilleri C (2012) Rapid Establishment of  
726 Genetic Incompatibility through Natural Epigenetic Variation. *Current biology : CB.*  
727 doi:10.1016/j.cub.2011.12.054
- 728 Durand S, Ricou A, Simon M, Dehaene N, Budar F, Camilleri C (2021) A restorer-of-  
729 fertility-like pentatricopeptide repeat protein promotes cytoplasmic male sterility in  
730 Arabidopsis thaliana. *Plant J* 105 (1):124-135. doi:10.1111/tpj.15045
- 731 Durvasula A, Fulgione A, Gutaker RM, Alacakaptan SI, Flood PJ, Neto C, Tsuchimatsu T,  
732 Burbano HA, Pico FX, Alonso-Blanco C, Hancock AM (2017) African genomes  
733 illuminate the early history and transition to selfing in Arabidopsis thaliana. *Proc Natl*  
734 *Acad Sci U S A* 114 (20):5213-5218. doi:10.1073/pnas.1616736114
- 735 Eickbush MT, Young JM, Zanders SE (2019) Killer Meiotic Drive and Dynamic Evolution of  
736 the wtf Gene Family. *Mol Biol Evol* 36 (6):1201-1214. doi:10.1093/molbev/msz052



- 737 Finseth FR, Dong Y, Saunders A, Fishman L (2015) Duplication and Adaptive Evolution of a  
738 Key Centromeric Protein in *Mimulus*, a Genus with Female Meiotic Drive. *Mol Biol*  
739 *Evol* 32 (10):2694-2706. doi:10.1093/molbev/msv145
- 740 Finseth FR, Nelson TC, Fishman L (2021) Selfish chromosomal drive shapes recent  
741 centromeric histone evolution in monkeyflowers. *PLoS Genet* 17 (4):e1009418.  
742 doi:10.1371/journal.pgen.1009418
- 743 Fishman L, McIntosh M (2019) Standard Deviations: The Biological Bases of Transmission  
744 Ratio Distortion. *Annu Rev Genet* 53:347-372. doi:10.1146/annurev-genet-112618-  
745 043905
- 746 Fishman L, Sweigart AL (2018) When Two Rights Make a Wrong: The Evolutionary  
747 Genetics of Plant Hybrid Incompatibilities. *Annu Rev Plant Biol* 69:707-731.  
748 doi:10.1146/annurev-arplant-042817-040113
- 749 Fulgione A, Koornneef M, Roux F, Hermisson J, Hancock AM (2018) Madeiran *Arabidopsis*  
750 *thaliana* Reveals Ancient Long-Range Colonization and Clarifies Demography in  
751 Eurasia. *Mol Biol Evol* 35 (3):564-574. doi:10.1093/molbev/msx300
- 752 Gobron N, Waszczak C, Simon M, Hiard S, Boivin S, Charif D, Ducamp A, Wenes E, Budar  
753 F (2013) A cryptic cytoplasmic male sterility unveils a possible gynodioecious past for  
754 *Arabidopsis thaliana*. *PLoS ONE* 8 (4):e62450. doi:10.1371/journal.pone.0062450
- 755 Grognet P, Lalucque H, Malagnac F, Silar P (2014) Genes that bias Mendelian segregation.  
756 *PLoS Genetics* 10 (5):e1004387. doi:10.1371/journal.pgen.1004387
- 757 Heazlewood JL, Tonti-Filippini JS, Gout AM, Day DA, Whelan J, Millar AH (2004)  
758 Experimental analysis of the *Arabidopsis* mitochondrial proteome highlights signaling  
759 and regulatory components, provides assessment of targeting prediction programs, and  
760 indicates plant-specific mitochondrial proteins. *Plant Cell* 16 (1):241-256.  
761 doi:10.1105/tpc.016055
- 762 Houben A (2017) B Chromosomes - A Matter of Chromosome Drive. *Front Plant Sci* 8:210.  
763 doi:10.3389/fpls.2017.00210
- 764 Jiao WB, Patel V, Klasen J, Liu F, Pecinkova P, Ferrand M, Gy I, Camilleri C, Effgen S,  
765 Koornneef M, Pecinka A, Loudet O, Schneeberger K (2021) The Evolutionary  
766 Dynamics of Genetic Incompatibilities Introduced by Duplicated Genes in  
767 *Arabidopsis thaliana*. *Mol Biol Evol* 38 (4):1225-1240. doi:10.1093/molbev/msaa306
- 768 Klodmann J, Senkler M, Rode C, Braun HP (2011) Defining the protein complex proteome of  
769 plant mitochondria. *Plant Physiol* 157 (2):587-598. doi:10.1104/pp.111.182352
- 770 Koide Y, Ogino A, Yoshikawa T, Kitashima Y, Saito N, Kanaoka Y, Onishi K, Yoshitake Y,  
771 Tsukiyama T, Saito H, Teraishi M, Yamagata Y, Uemura A, Takagi H, Hayashi Y,  
772 Abe T, Fukuta Y, Okumoto Y, Kanazawa A (2018) Lineage-specific gene acquisition  
773 or loss is involved in interspecific hybrid sterility in rice. *Proc Natl Acad Sci U S A*  
774 115 (9):E1955-E1962. doi:10.1073/pnas.1711656115
- 775 Koide Y, Shinya Y, Ikenaga M, Sawamura N, Matsubara K, Onishi K, Kanazawa A, Sano Y  
776 (2012) Complex genetic nature of sex-independent transmission ratio distortion in  
777 Asian rice species: the involvement of unlinked modifiers and sex-specific  
778 mechanisms. *Heredity (Edinb)* 108 (3):242-247. doi:10.1038/hdy.2011.64
- 779 Konig AC, Hartl M, Boersema PJ, Mann M, Finkemeier I (2014) The mitochondrial lysine  
780 acetylome of *Arabidopsis*. *Mitochondrion* 19 Pt B:252-260.  
781 doi:10.1016/j.mito.2014.03.004
- 782 Koren S, Walenz BP, Berlin K, Miller JR, Bergman NH, Phillippy AM (2017) Canu: scalable  
783 and accurate long-read assembly via adaptive k-mer weighting and repeat separation.  
784 *Genome Res* 27 (5):722-736. doi:10.1101/gr.215087.116
- 785 Krishnakumar V, Hanlon MR, Contrino S, Ferlanti ES, Karamycheva S, Kim M, Rosen BD,  
786 Cheng CY, Moreira W, Mock SA, Stubbs J, Sullivan JM, Krampis K, Miller JR,



- 787 Micklem G, Vaughn M, Town CD (2015) Araport: the Arabidopsis information portal.  
788 Nucleic Acids Res 43 (Database issue):D1003-1009. doi:10.1093/nar/gku1200
- 789 Larracuente AM, Presgraves DC (2012) The Selfish Segregation Distorter Gene Complex of  
790 *Drosophila melanogaster*. Genetics 192 (1):33-53. doi:10.1534/genetics.112.141390
- 791 Li H (2018) Minimap2: pairwise alignment for nucleotide sequences. Bioinformatics 34  
792 (18):3094-3100. doi:10.1093/bioinformatics/bty191
- 793 Li H, Durbin R (2009) Fast and accurate short read alignment with Burrows-Wheeler  
794 transform. Bioinformatics 25 (14):1754-1760. doi:10.1093/bioinformatics/btp324
- 795 Lindholm AK, Dyer KA, Firman RC, Fishman L, Forstmeier W, Holman L, Johannesson H,  
796 Knief U, Kokko H, Larracuente AM, Manser A, Montchamp-Moreau C, Petrosyan  
797 VG, Pomiankowski A, Presgraves DC, Safronova LD, Sutter A, Unckless RL,  
798 Verspoor RL, Wedell N, Wilkinson GS, Price TAR (2016) The Ecology and  
799 Evolutionary Dynamics of Meiotic Drive. Trends Ecol Evol 31 (4):315-326.  
800 doi:10.1016/j.tree.2016.02.001
- 801 Liu B, Li JQ, Liu XD, Shahid MQ, Shi LG, Lu YG (2011) Identification of neutral genes at  
802 pollen sterility loci Sd and Se of cultivated rice (*Oryza sativa*) with wild rice (*O.*  
803 *rufipogon*) origin. Genet Mol Res 10 (4):3435-3445. doi:10.4238/2011.October.31.10
- 804 Long Y, Zhao L, Niu B, Su J, Wu H, Chen Y, Zhang Q, Guo J, Zhuang C, Mei M, Xia J,  
805 Wang L, Liu YG (2008) Hybrid male sterility in rice controlled by interaction between  
806 divergent alleles of two adjacent genes. Proc Natl Acad Sci U S A 105 (48):18871-  
807 18876. doi:10.1073/pnas.0810108105
- 808 Loudet O, Chaillou S, Camilleri C, Bouchez D, Daniel-Vedele F (2002) Bay-0 x Shahdara  
809 recombinant inbred line population: a powerful tool for the genetic dissection of  
810 complex traits in Arabidopsis. Theor Appl Genet 104 (6-7):1173-1184.  
811 doi:10.1007/s00122-001-0825-9
- 812 Mani K, Fay DS (2009) A mechanistic basis for the coordinated regulation of pharyngeal  
813 morphogenesis in *Caenorhabditis elegans* by LIN-35/Rb and UBC-18-ARI-1. PLoS  
814 Genet 5 (6):e1000510. doi:10.1371/journal.pgen.1000510
- 815 Matsubara K, Ebana K, Mizubayashi T, Itoh S, Ando T, Nonoue Y, Ono N, Shibaya T, Ogiso  
816 E, Hori K, Fukuoka S, Yano M (2011) Relationship between transmission ratio  
817 distortion and genetic divergence in intraspecific rice crosses. Mol Genet Genomics  
818 286 (5-6):307-319. doi:10.1007/s00438-011-0648-6
- 819 Mayjonade B, Gouzy J, Donnadiou C, Pouilly N, Marande W, Callot C, Langlade N, Munos S  
820 (2016) Extraction of high-molecular-weight genomic DNA for long-read sequencing  
821 of single molecules. Biotechniques 61 (4):203-205. doi:10.2144/000114460
- 822 Morineau C, Gissot L, Bellec Y, Hematy K, Tellier F, Renne C, Haslam R, Beaudoin F,  
823 Napier J, Faure JD (2016) Dual Fatty Acid Elongase Complex Interactions in  
824 Arabidopsis. PLoS One 11 (9):e0160631. doi:10.1371/journal.pone.0160631
- 825 Nuckolls NL, Bravo Nunez MA, Eickbush MT, Young JM, Lange JJ, Yu JS, Smith GR,  
826 Jaspersen SL, Malik HS, Zanders SE (2017) wtf genes are prolific dual poison-  
827 antidote meiotic drivers. Elife 6. doi:10.7554/eLife.26033
- 828 Nuckolls NL, Mok AC, Lange JJ, Yi K, Kandola TS, Hunn AM, McCroskey S, Snyder JL,  
829 Bravo Nunez MA, McClain M, McKinney SA, Wood C, Halfmann R, Zanders SE  
830 (2020) The wtf4 meiotic driver utilizes controlled protein aggregation to generate  
831 selective cell death. Elife 9. doi:10.7554/eLife.55694
- 832 Östergren G (1945) Parasitic nature of extra fragment chromosomes. Bot Not 2:157-163  
833
- 834 Ouyang Y, Zhang Q (2013) Understanding reproductive isolation based on the rice model.  
835 Annu Rev Plant Biol 64:111-135. doi:10.1146/annurev-arplant-050312-120205

- 836 Ouyang Y, Zhang Q (2018) The molecular and evolutionary basis of reproductive isolation in  
837 plants. *J Genet Genomics* 45 (11):613-620. doi:10.1016/j.jgg.2018.10.004
- 838 Presgraves DC (2010) The molecular evolutionary basis of species formation. *Nature reviews*  
839 *Genetics* 11 (3):175-180. doi:10.1038/nrg2718
- 840 Quesneville H, Bergman CM, Andrieu O, Autard D, Nouaud D, Ashburner M, Anxolabehere  
841 D (2005) Combined evidence annotation of transposable elements in genome  
842 sequences. *PLoS Comput Biol* 1 (2):166-175. doi:10.1371/journal.pcbi.0010022
- 843 Rick CM (1966) Abortion of male and female gametes in the tomato determined by allelic  
844 interaction. *Genetics* 53 (1):85-96
- 845 Rick CM (1971) The tomato ge locus: linkage relations and geographic distribution of alleles.  
846 *Genetics* 67 (1):75-85
- 847 Ross KJ, Fransz P, Jones GH (1996) A light microscopic atlas of meiosis in *Arabidopsis*  
848 *thaliana*. *Chromosome Res* 4 (7):507-516. doi:10.1007/BF02261778
- 849 Russo A, Potente G, Mayjonade B (2021) HMW DNA extraction from diverse plants species  
850 for PacBio and Nanopore sequencing. protocolsio  
851 doi:dx.doi.org/10.17504/protocols.io.5t7g6rn
- 852 Sallet E, Gouzy J, Schiex T (2019) EuGene: An Automated Integrative Gene Finder for  
853 Eukaryotes and Prokaryotes. *Methods Mol Biol* 1962:97-120. doi:10.1007/978-1-  
854 4939-9173-0\_6
- 855 Salome PA, Bomblies K, Fitz J, Laitinen RA, Warthmann N, Yant L, Weigel D (2012) The  
856 recombination landscape in *Arabidopsis thaliana* F2 populations. *Heredity (Edinb)* 108  
857 (4):447-455. doi:10.1038/hdy.2011.95
- 858 Samuel MA, Salt JN, Shiu SH, Goring DR (2006) Multifunctional arm repeat domains in  
859 plants. *Int Rev Cytol* 253:1-26. doi:10.1016/S0074-7696(06)53001-3
- 860 Senkler J, Senkler M, Eubel H, Hildebrandt T, Lengwenus C, Schertl P, Schwarzlander M,  
861 Wagner S, Wittig I, Braun HP (2017) The mitochondrial complexome of *Arabidopsis*  
862 *thaliana*. *Plant J* 89 (6):1079-1092. doi:10.1111/tpj.13448
- 863 Seymour DK, Chae E, Arioz BI, Koenig D, Weigel D (2019) Transmission ratio distortion is  
864 frequent in *Arabidopsis thaliana* controlled crosses. *Heredity (Edinb)* 122 (3):294-304.  
865 doi:10.1038/s41437-018-0107-9
- 866 Simon M, Durand S, Pluta N, Gobron N, Botran L, Ricou A, Camilleri C, Budar F (2016)  
867 Genomic Conflicts that Cause Pollen Mortality and Raise Reproductive Barriers in  
868 *Arabidopsis thaliana*. *Genetics* 203 (3):1353-1367. doi:10.1534/genetics.115.183707
- 869 Simon M, Simon A, Martins F, Botran L, Tisne S, Granier F, Loudet O, Camilleri C (2012)  
870 DNA fingerprinting and new tools for fine-scale discrimination of *Arabidopsis*  
871 *thaliana* accessions. *The Plant journal : for cell and molecular biology* 69 (6):1094-  
872 1101. doi:10.1111/j.1365-313X.2011.04852.x
- 873 Sweigart AL, Brandvain Y, Fishman L (2019) Making a Murderer: The Evolutionary Framing  
874 of Hybrid Gamete-Killers. *Trends Genet.* doi:10.1016/j.tig.2019.01.004
- 875 Tan YF, O'Toole N, Taylor NL, Millar AH (2010) Divalent metal ions in plant mitochondria  
876 and their role in interactions with proteins and oxidative stress-induced damage to  
877 respiratory function. *Plant Physiol* 152 (2):747-761. doi:10.1104/pp.109.147942
- 878 Tang H, Zhang X, Miao C, Zhang J, Ming R, Schnable JC, Schnable PS, Lyons E, Lu J  
879 (2015) ALLMAPS: robust scaffold ordering based on multiple maps. *Genome Biol*  
880 16:3. doi:10.1186/s13059-014-0573-1
- 881 Taylor NL, Heazlewood JL, Millar AH (2011) The *Arabidopsis thaliana* 2-D gel  
882 mitochondrial proteome: Refining the value of reference maps for assessing protein  
883 abundance, contaminants and post-translational modifications. *Proteomics* 11  
884 (9):1720-1733. doi:10.1002/pmic.201000620

- 885 Turner BC (2001) Geographic distribution of neurospora spore killer strains and strains  
886 resistant to killing. *Fungal Genet Biol* 32 (2):93-104. doi:10.1006/fgbi.2001.1253
- 887 Vaid N, Laitinen RAE (2019) Diverse paths to hybrid incompatibility in Arabidopsis. *Plant J*  
888 97 (1):199-213. doi:10.1111/tpj.14061
- 889 Walker BJ, Abeel T, Shea T, Priest M, Abouelliel A, Sakthikumar S, Cuomo CA, Zeng Q,  
890 Wortman J, Young SK, Earl AM (2014) Pilon: an integrated tool for comprehensive  
891 microbial variant detection and genome assembly improvement. *PLoS One* 9  
892 (11):e112963. doi:10.1371/journal.pone.0112963
- 893 Wang GW, He YQ, Xu CG, Zhang Q (2005) Identification and confirmation of three neutral  
894 alleles conferring wide compatibility in inter-subspecific hybrids of rice (*Oryza sativa*  
895 L.) using near-isogenic lines. *Theor Appl Genet* 111 (4):702-710. doi:10.1007/s00122-  
896 005-2055-z
- 897 Wu TD, Watanabe CK (2005) GMAP: a genomic mapping and alignment program for mRNA  
898 and EST sequences. *Bioinformatics* 21 (9):1859-1875.  
899 doi:10.1093/bioinformatics/bti310
- 900 Xie Y, Tang J, Xie X, Li X, Huang J, Fei Y, Han J, Chen S, Tang H, Zhao X, Tao D, Xu P,  
901 Liu YG, Chen L (2019) An asymmetric allelic interaction drives allele transmission  
902 bias in interspecific rice hybrids. *Nat Commun* 10 (1):2501. doi:10.1038/s41467-019-  
903 10488-3
- 904 Yang J, Zhao X, Cheng K, Du H, Ouyang Y, Chen J, Qiu S, Huang J, Jiang Y, Jiang L, Ding  
905 J, Wang J, Xu C, Li X, Zhang Q (2012) A killer-protector system regulates both  
906 hybrid sterility and segregation distortion in rice. *Science* 337 (6100):1336-1340.  
907 doi:10.1126/science.1223702
- 908 Yu X, Zhao Z, Zheng X, Zhou J, Kong W, Wang P, Bai W, Zheng H, Zhang H, Li J, Liu J,  
909 Wang Q, Zhang L, Liu K, Yu Y, Guo X, Wang J, Lin Q, Wu F, Ren Y, Zhu S, Zhang  
910 X, Cheng Z, Lei C, Liu S, Liu X, Tian Y, Jiang L, Ge S, Wu C, Tao D, Wang H, Wan  
911 J (2018) A selfish genetic element confers non-Mendelian inheritance in rice. *Science*  
912 360 (6393):1130-1132. doi:10.1126/science.aar4279
- 913 Yu Y, Zhao Z, Shi Y, Tian H, Liu L, Bian X, Xu Y, Zheng X, Gan L, Shen Y, Wang C, Yu  
914 X, Wang C, Zhang X, Guo X, Wang J, Ikehashi H, Jiang L, Wan J (2016) Hybrid  
915 Sterility in Rice (*Oryza sativa* L.) Involves the Tetratricopeptide Repeat Domain  
916 Containing Protein. *Genetics* 203 (3):1439-1451. doi:10.1534/genetics.115.183848
- 917 Zhang C, Wang D, Wang J, Sun Q, Tian L, Tang X, Yuan Z, He H, Yu S (2020) Genetic  
918 Dissection and Validation of Chromosomal Regions for Transmission Ratio Distortion  
919 in Intersubspecific Crosses of Rice. *Front Plant Sci* 11:563548.  
920 doi:10.3389/fpls.2020.563548
- 921 Zhang C, Wang J, Marowsky NC, Long M, Wing RA, Fan C (2013) High occurrence of  
922 functional new chimeric genes in survey of rice chromosome 3 short arm genome  
923 sequences. *Genome Biol Evol* 5 (5):1038-1048. doi:10.1093/gbe/evt071
- 924 Zhang Y, Swart C, Alseekh S, Scossa F, Jiang L, Obata T, Graf A, Fernie AR (2018) The  
925 Extra-Pathway Interactome of the TCA Cycle: Expected and Unexpected Metabolic  
926 Interactions. *Plant Physiol* 177 (3):966-979. doi:10.1104/pp.17.01687
- 927
- 928

929 Figure Supplements:

930 Figure 8 Supplement 1: *Mrfri* has the same killer behaviour as Mr-0.

931 Figure 8 Supplement 2: Genetic and phenotypic characterization of the Col<sup>mut530</sup> mutant.

932 Table 4 Supplement 1: Control of segregation at L3 in the progenies of F1 (Ct-1 x Col-0).

933 Figure 9 Supplement 1: Tree of protein sequences for deoxyhypusine hydroxylases from  
934 different taxa and their homologues in *A. thaliana*.

935

936 Source Data Files:

937 Table 1 Source Data 1: Segregations at L3 in progenies of crosses of Mr-0 with different natural  
938 accessions.

939 Table 2 Source Data 2: Segregations at L3 in progenies of crosses of different natural accessions  
940 with Sha.

941 Figure 4 Source Data 1: countings of abortive and normal grains in developing and mature  
942 pollen of plants with PK3 and parental controls.

943 Figure 5 Source Data 1: Segregation analyses in the self descent of 23 recombinants identified  
944 in PK3 fine mapping.

945 Figure 5 Source Data 2: Segregation at L3 in self progenies of hybrid plants derived from  
946 recombinants 52D7, 8F10BH2 and 23G9.

947 Figure 5 Source Data 3: Genetic markers.

948 Figure 6 Source Data 1: PK3 locus DNA sequence resources.

949 Figure 8 Source Data 1: annotated genes in the PK3B interval.

950 Figure 8 Source Data 2: Segregation analyses of *Mrfri* x Col<sup>mut</sup> F2 families.

951 Figure 8 Source Data 3: Transmission of the Col<sup>mut499</sup> and Col<sup>mut530</sup> alleles from female and  
952 male sides.

953 Figure 8 Source Data 4: raw gels of RT-PCR experiments on PK3B genes.

954 Figure 9 Source Data 1: Segregation at L3 in reciprocal self progenies of hybrid plants derived  
955 from recombinants 52D7, 8F10BH2 and 18D1BC7.

956 Figure 10 Source Data 1: multifasta of APOK3 gene sequences from 27 accessions of known  
957 status at PK3.

958

959 Supplemental File 1: PCR primers.

960

961

962

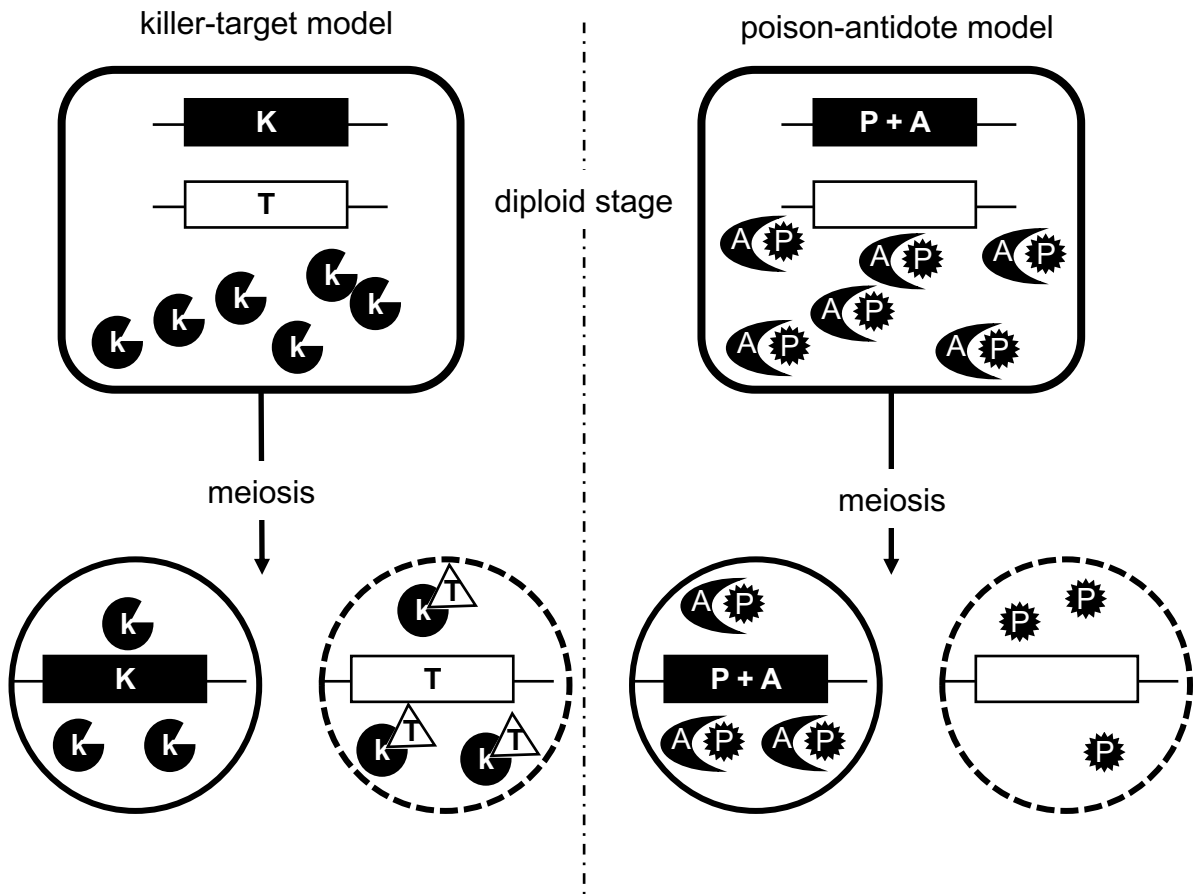

**Figure 1: Two genetic models of gamete killers.**

The locus is represented as a horizontal line with the killer and killed alleles as black and white boxes, respectively. For these general models, there is no hypothesis on the number of genes present in each box. In both models, the black allele is expressed before meiosis, and the killer (K) or poison (P) persists in all the gametes. In the killer-target model, only gametes with the white allele express the target (T), which interacts with K to trigger gamete death (represented as dashed outline). In the poison-antidote model, the black allele also produces a short-lived antidote (A) that counteracts P, so only the gametes that inherit the black allele are efficiently protected.



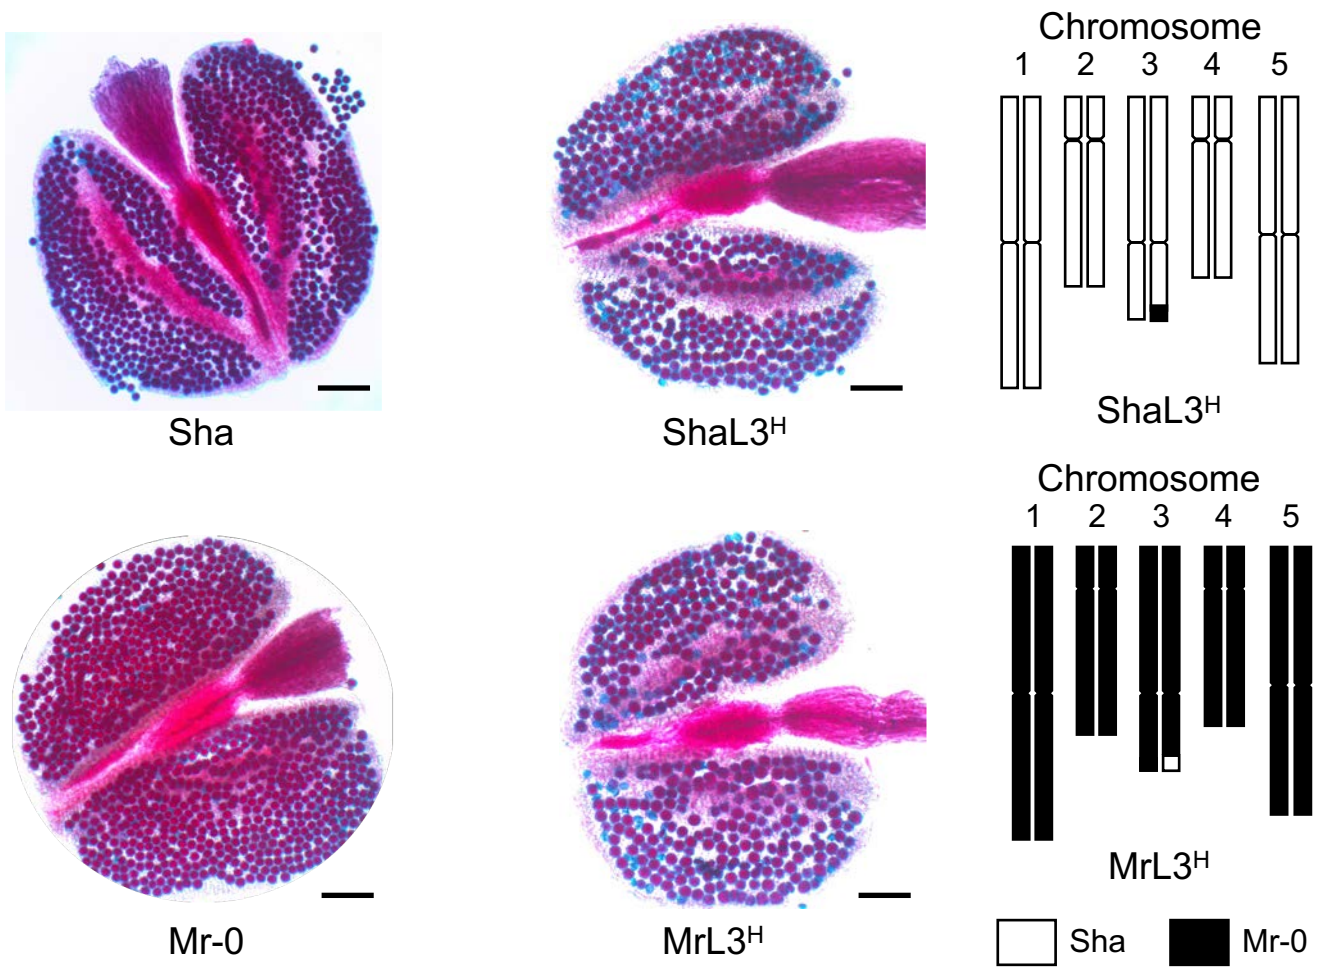

**Figure 2: Plants heterozygous at L3 in either Sha or Mr-0 nuclear backgrounds show dead pollen.**

Typical pollen phenotypes (Alexander staining of anthers) of ShaL3<sup>H</sup> and MrL3<sup>H</sup> plants compared to the parental accessions Sha and Mr-0. Viable pollen grains are stained in red, aborted pollen grains appear in blue. Scale bars: 100 μm. Graphical representations of ShaL3<sup>H</sup> and MrL3<sup>H</sup> genotypes are displayed on the right.



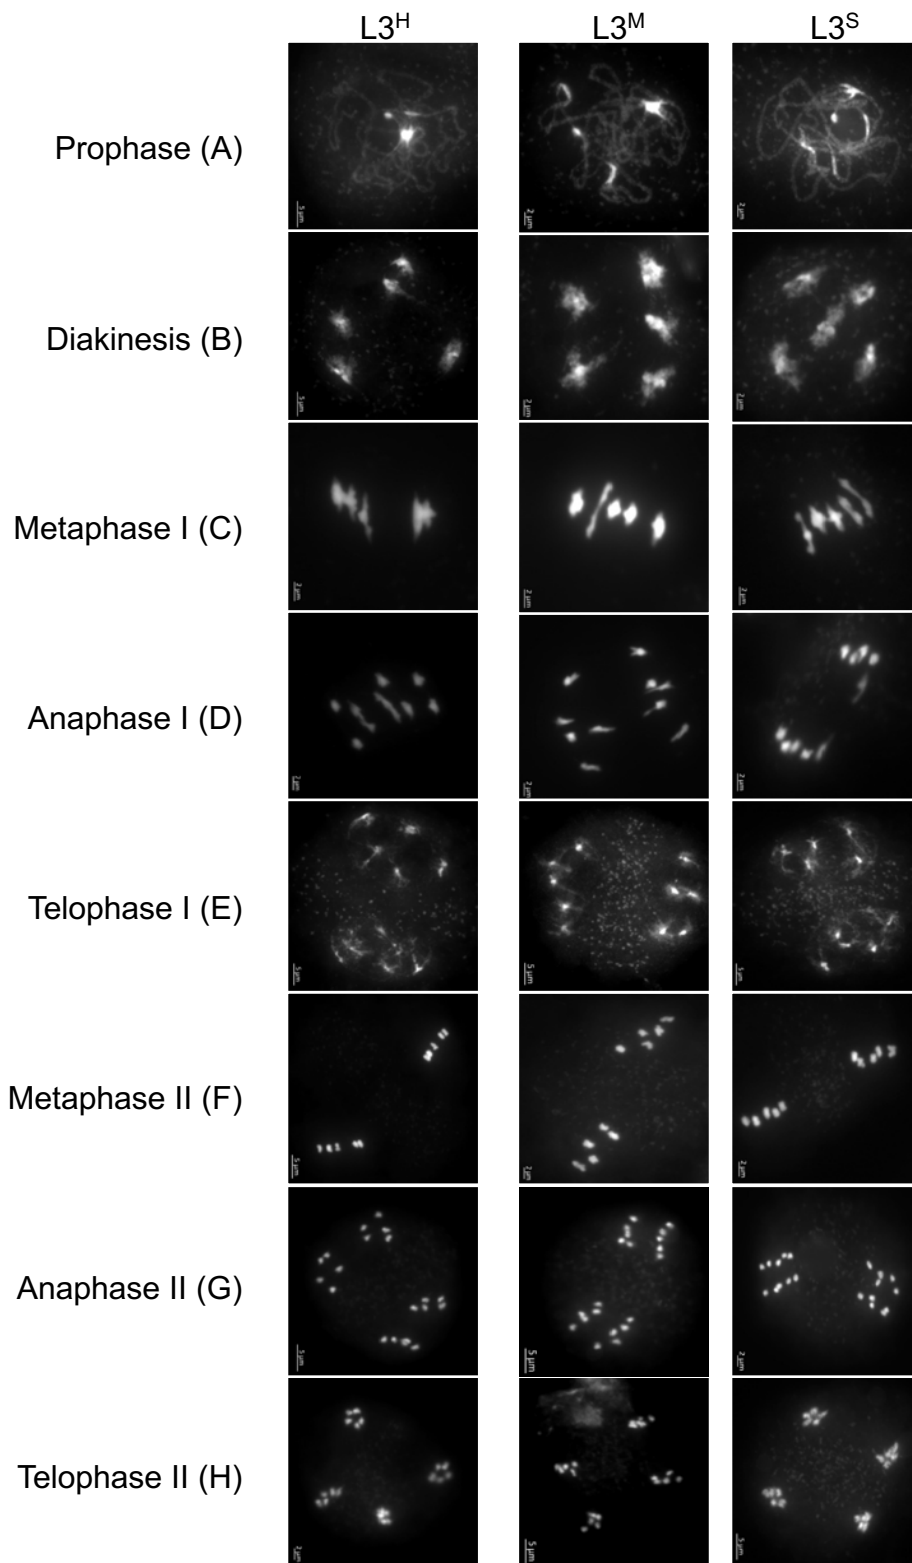

**Figure 3 : Plants heterozygous at L3 in Sha nuclear background have a normal male meiosis.**

The meiotic progression was analyzed by DAPI staining of meiotic chromosome spreads on anthers from siblings from a ShaL3<sup>H</sup> plant. During prophase I (A), meiotic chromosomes condense, recombine and undergo synapsis, resulting in the formation of five bivalents which become visible at diakinesis (B). The bivalents align at metaphase I (C), and chromosomes separate from their homologues at anaphase I (D), leading to the formation of two pools of five chromosomes and two nuclei (E). At the second meiotic division, the pairs of sister chromatids align on the two metaphase plates (F), and separate at anaphase II (G) to generate four pools of five chromosomes, which give rise to tetrads of four microspores (H). The meiotic progression in plants heterozygous at L3 (L3<sup>H</sup>, N=322) is identical to those homozygous Sha (L3<sup>S</sup>, N=166), and Mr-0 (L3<sup>M</sup>, N=77).

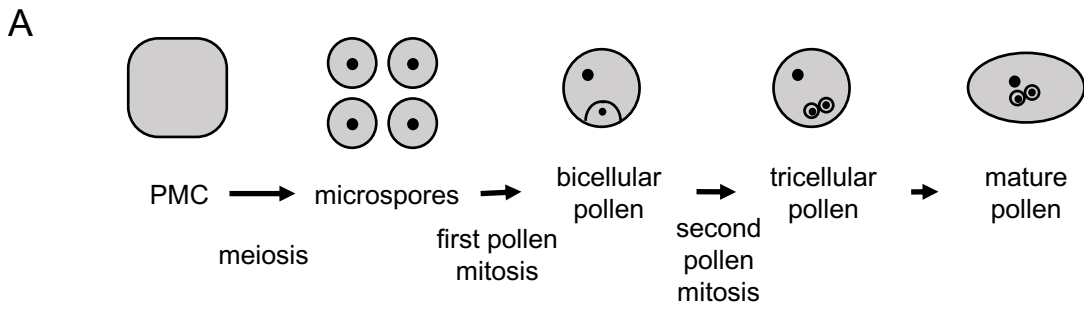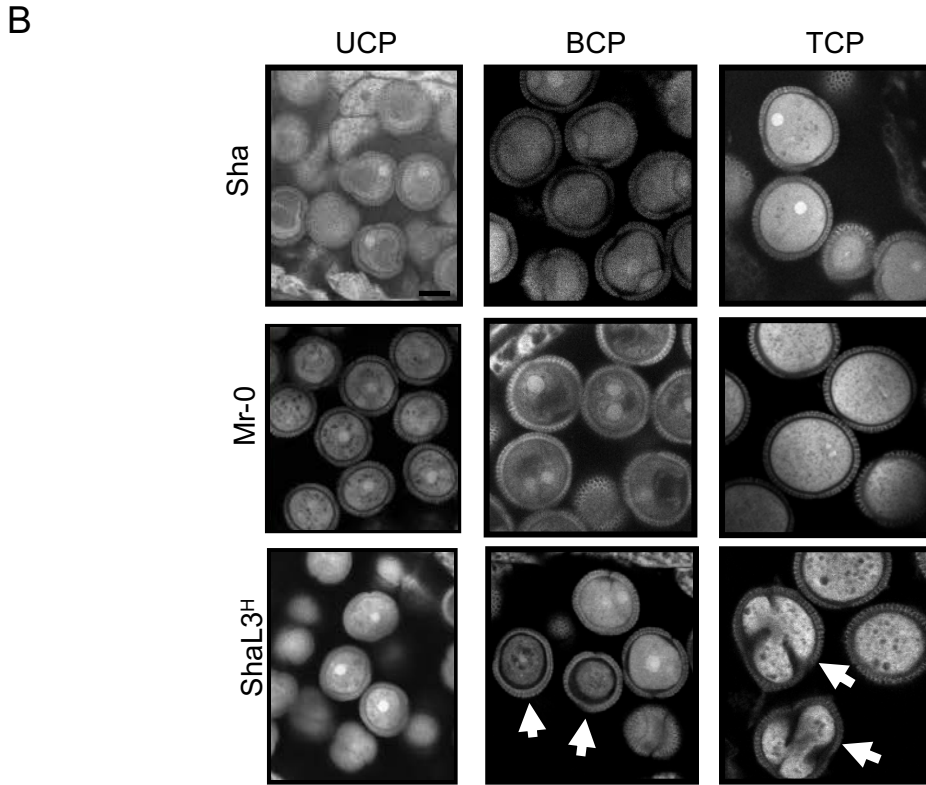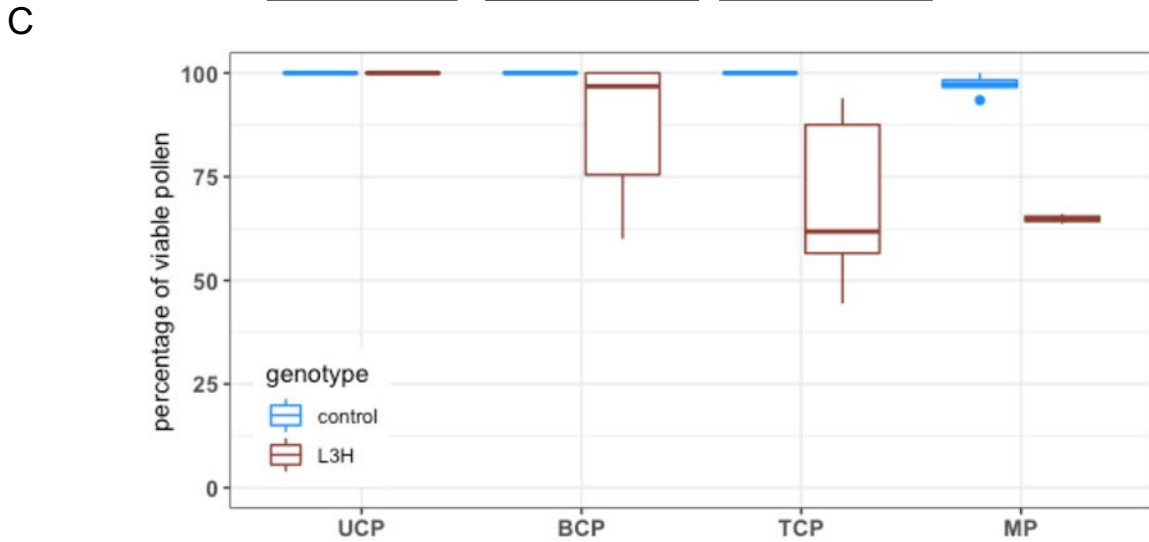

**Figure 4: Pollen from plants heterozygous at L3 abort progressively from bicellular stage.**

A: The scheme outlines the main steps of pollen development in *A. thaliana*: the pollen mother cell (PMC) produces haploid microspores (or unicellular pollen, UCP) through meiosis; the first pollen mitosis produces bicellular pollen (BCP); the reproductive cell divides in the second pollen mitosis to give tricellular pollen (TCP), which evolves into mature pollen (MP). B: Typical confocal images of male gametogenesis in ShaL3<sup>H</sup> plants (bottom row) and in Sha and Mr-0 parental controls after propidium iodide (PI) staining. White arrows indicate abortive pollen. Scale bar: 10µm. C: Percentage of normal pollen (Figure 4-Source Data 1) in anthers of pooled parental (blue) and ShaL3<sup>H</sup> (brown) plants at different stages of development (countings from confocal acquisitions of PI stainings), and in mature pollen (countings from Alexander staining).

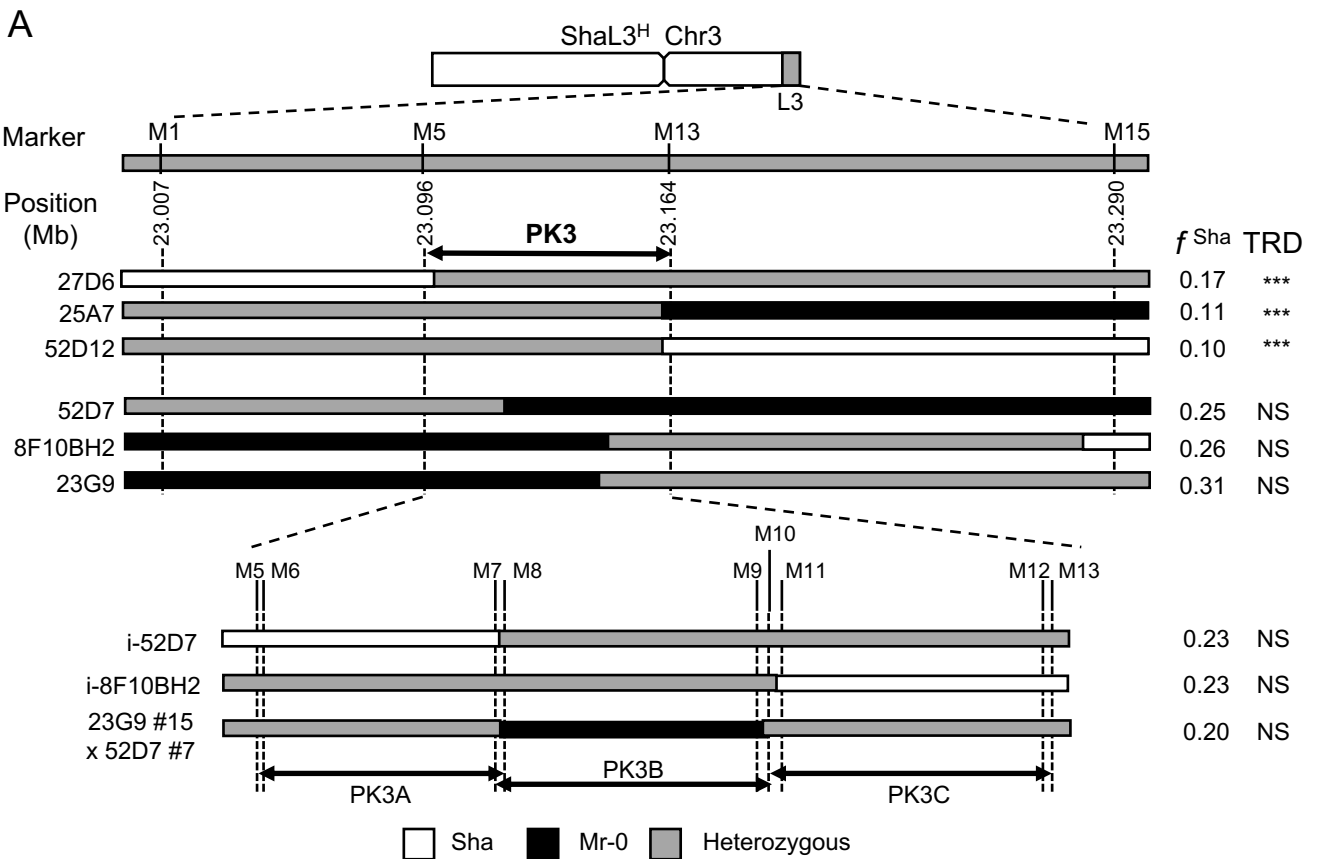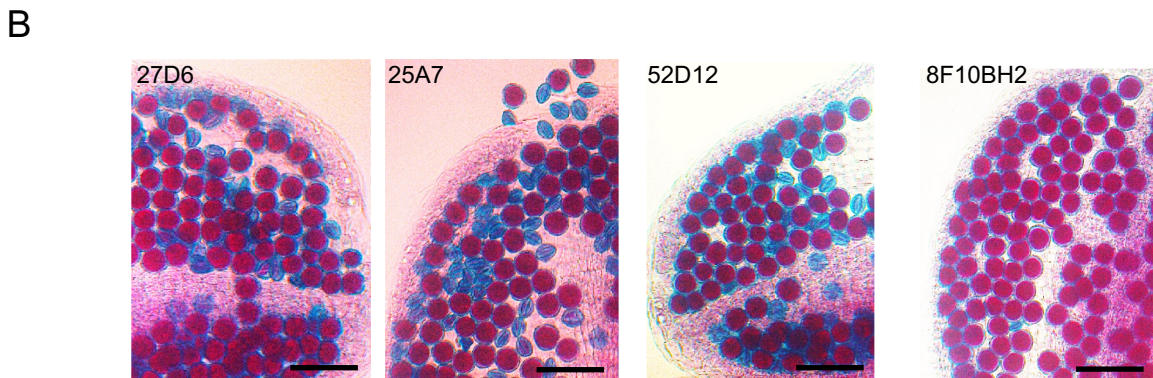

**Figure 5: Fine mapping of the PK3 locus.**

A: The upper panel shows the mapping of PK3 in the L3 locus delimited by the genetic markers M1 and M15 (Figure 5-Source Data 1). Markers M5 and M13 delimit the PK3 interval, where all the PK elements required to cause the segregation bias are present. Positions of markers on the TAIR10 Col-0 genomic sequence are given. The most relevant recombinants are shown, with the frequencies of Sha homozygotes ( $f^{Sha}$ ) observed in their selfed progenies indicated on the right. TRD, transmission ratio distortion (chi square test for 1:2:1 segregation) \*\*\*  $p < 0.001$ , NS: not significant. The lower panel shows the further dissection of the PK3 locus into PK3A, PK3B and PK3C (Figure 5-Source Data 2). Because some markers are very close to each other (Figure 5-Source Data 1), this diagram is not to scale. Genotypes used to dissect the PK3 are presented: i-52D7 and i-8F10BH2 result from crosses of 52D7 and 8F10BH2, respectively, with Sha; the 23G9#15 x 52D7#7 genotype, with two heterozygous regions flanking a fixed central region of the PK3, was produced by crossing appropriate selfed progenies of 23G9 and 52D7 recombinants. All markers are described in Figure 5-Source Data 3. B: Pollen viability in recombinants used to delineate the PK3 interval. Representative images of Alexander staining of anthers from recombinants presented in A. Aborted pollen grains are blue whereas living pollen grains are red. Scale bar: 50 $\mu$ m.

A

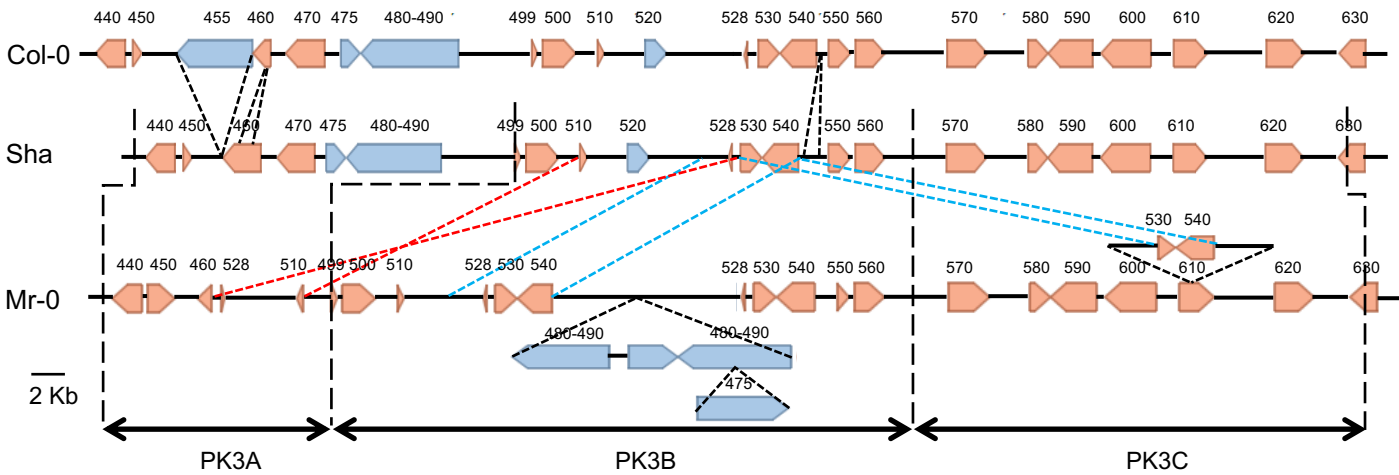

B

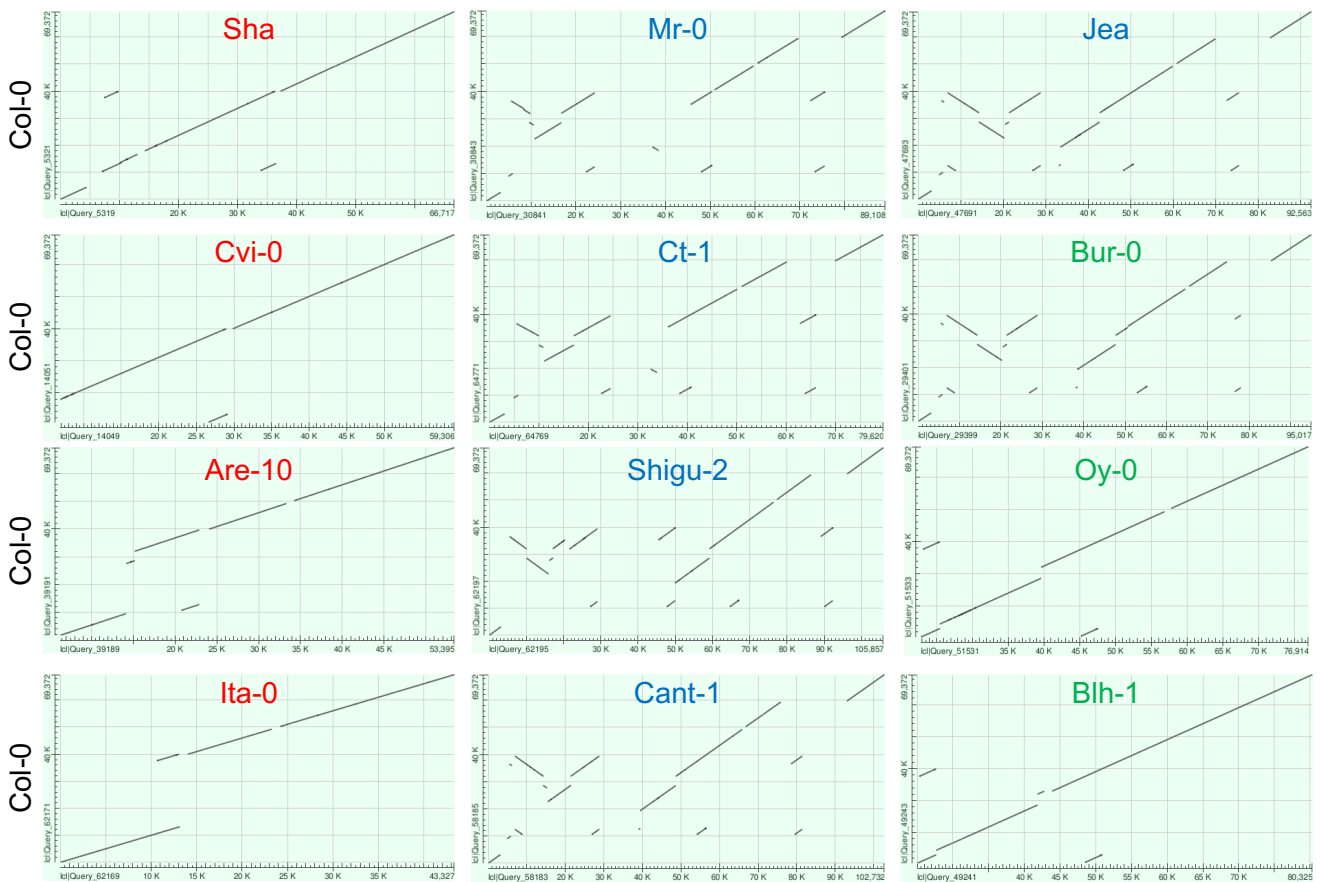

**Figure 6: Structural variation at the PK3 locus.**

A: PK3 locus in Col-0, Sha and Mr-0. Beige and blue plain arrows represent protein coding genes and TEs, respectively, with their orientations. Gene labels on the Col-0 locus correspond to the last three digits of AT3G62xxx gene identifiers in the reference sequence (TAIR10), the same numbers on Sha and Mr-0 loci indicate genes homologous to the Col-0 genes. Black, red and blue dotted lines respectively represent insertions/deletions, inversions and duplications. The limits of the PK3A, PK3B and PK3C intervals in Sha and Mr-0 are indicated (dashed broken lines). B: Dot plots of PK3 sequences of 12 accessions (x axes) against the reference Col-0 (y axes), generated at NCBI using the nucleotide Blast tool with the option 'align two or more sequences' and the following settings: max target = 10, Expect threshold = 0.001, word size = 256 (Altschul et al. 1990). The names of killer, neutral and killed accessions are in blue, green and red, respectively. The sequences can be accessed by DOI numbers indicated in Figure 6 Source Data 1, with positions of the PK3 sequences.

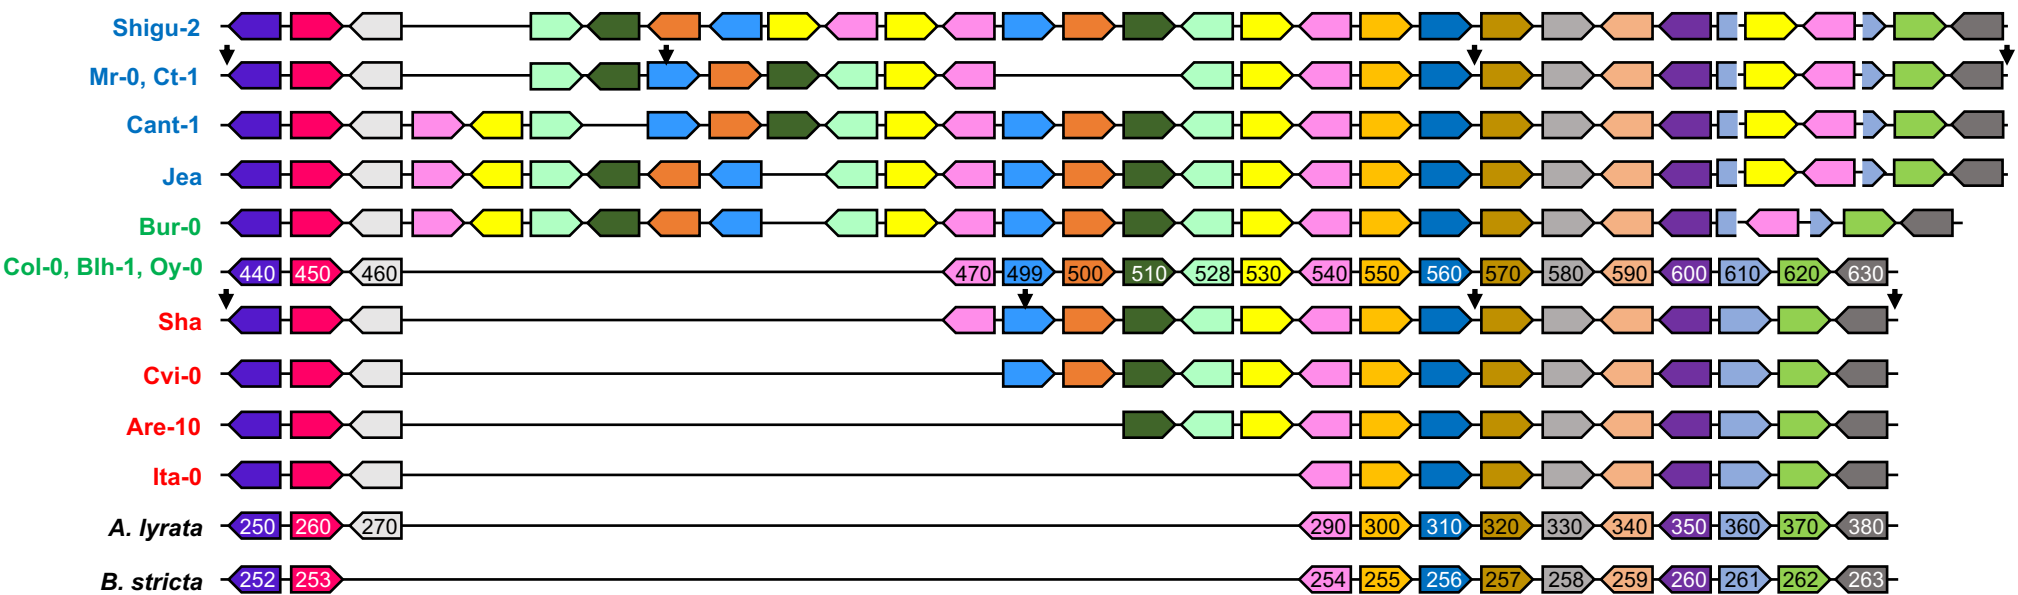

**Figure 7: Intra and Inter-specific synteny of protein coding genes at the PK3 locus.**

Align the PK3 loci from thirteen *A. thaliana* accessions and two related species, *Arabidopsis lyrata* and *Boechera stricta*, drawn to highlight synteny between protein coding genes. The scheme is not to scale and TEs are not represented. For *A. lyrata* and *B. stricta* the structural annotation was obtained from Phytozome (<https://phytozome.jgi.doe.gov/>). The names of killer, neutral and killed *A. thaliana* accessions are written in blue, green and red, respectively. Plain coloured arrows represent coding genes with their orientations, each colour representing orthologues and paralogues of a same gene. Gene labels correspond to the last three digits of AT3G62xxx, AL5G45xxx and Bostr.13158s0xxx gene identifiers in *A. thaliana* (Col-0 reference sequence TAIR10), *A. lyrata* (V2.1) and *B. stricta* (V1.2), respectively. Black arrows above the Mr-0 and Sha loci delimit the PK3A, PK3B and PK3C intervals from left to right.

| Analysed gene | Pollen viability in F1: Mrfri x Col <sup>mut</sup>                                  | TRD F2 | TRD test cross as male | TRD test cross as female | Expression in microspores                                                             |         |   |
|---------------|-------------------------------------------------------------------------------------|--------|------------------------|--------------------------|---------------------------------------------------------------------------------------|---------|---|
|               |                                                                                     |        |                        |                          | S                                                                                     | M       | C |
| AT3G62499     | 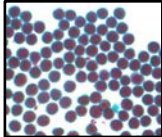   | *      | NS                     | NS                       |    | ←187 pb |   |
| AT3G62500     |    | NS     | nd                     | nd                       |    | ←124 pb |   |
| AT3G62510     |    | NS     | nd                     | nd                       |    | ←161 pb |   |
| AT3G62528     |    | NS     | nd                     | nd                       |    | ←168 pb |   |
| AT3G62530     |    | ***    | ***                    | NS                       |    | ←165 pb |   |
| AT3G62540     |   | NS     | nd                     | nd                       |   | ←653 pb |   |
| AT3G62550     |  | NS     | nd                     | nd                       |  | ←182 pb |   |
| AT3G62560     |  | NS     | nd                     | nd                       |  | ←183 pb |   |
| WT control    |  | NS     | nd                     | nd                       |                                                                                       |         |   |

**Figure 8: Analysis of mutants and microspore expression for PK3B coding genes.**

We tested each coding gene at PK3B for an putative antidote behavior. Each homozygous Col-0 mutant (Figure 8-Source Data 1) was crossed with Mrfri (Figure 8 Supplement 1) and we observed pollen viability (Alexander staining of anthers) in each Mrfri x Col<sup>mut</sup> F1. Viable pollen grains are stained in red, aborted pollen grains appear in blue. Scale bar: 50µm. F2 progenies of each F1 were tested for a transmission ratio distortion (TRD) at PK3 (Figure 8 – Source Data 2). The transmission of Col<sup>mut499</sup> and Col<sup>mut530</sup> alleles through male and female gametes were tested in test crosses (Figure 8- Source Data 3). NS, not significant; \* pvalue <0.05; \*\*\*pvalue < 0.001; nd, not determined. The T-DNA insertion in the Col<sup>mut530</sup> allele was characterized (Figure 8 Supplement 2). On the right, RT-PCR results for expression of PK3B genes from Sha (S), Mr-0 (M) and Col-0 (C) alleles in purified microspores are given (Figure 8 – Source Data 4). The Mr-0 allele was analysed in a progeny of Sha L3<sup>H</sup> homozygous Mr-0 at L3. PCR primers used (Supplemental File 1) do not allow to distinguish the two or three copies of AT3G62510, AT3G62528, AT3G62530 and AT3G62540 that exist in the Mr-0 allele. The expected sizes of the amplification products are given on the right.



A

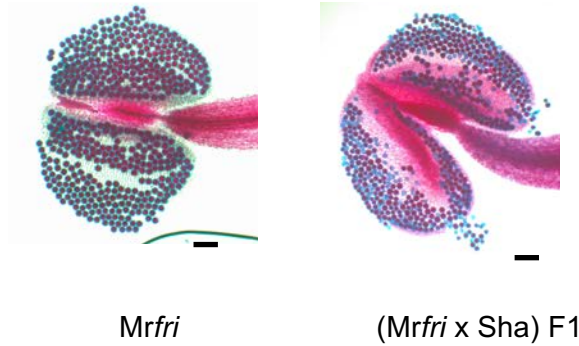

Mrfri

(Mrfri x Sha) F1

B

| Segregation at L3 in <i>Mrfri</i> x Sha and Mr-0x Sha F2 populations  |                  |     |      |       |                            |                       |
|-----------------------------------------------------------------------|------------------|-----|------|-------|----------------------------|-----------------------|
| Genotype                                                              | Number of plants |     |      |       | $p \chi^2 (1:2:1)$         | $f \text{ Sha}^{(3)}$ |
|                                                                       | Sha              | Hz  | Mr-0 | Total |                            |                       |
| <i>Mrfri</i> x Sha <sup>(1)</sup>                                     | 9                | 103 | 72   | 184   | $1.2 \cdot 10^{-10}^{***}$ | 0.05                  |
| Mr-0 x Sha <sup>(2)</sup>                                             | 5                | 76  | 99   | 180   | $5.4 \cdot 10^{-24}^{***}$ | 0.03                  |
| (1) genotyped at marker M1 (Figure 5 Source Data 3)                   |                  |     |      |       |                            |                       |
| (2) genotyped at position 23,438,239; results from Simon et al (2016) |                  |     |      |       |                            |                       |
| (3) Frequency of Sha homozygotes (expected frequency 0.25)            |                  |     |      |       |                            |                       |
| *** $p < 0.001$                                                       |                  |     |      |       |                            |                       |

**Figure 8 Supplement 1: *Mrfri* has a killer behaviour at PK3, as Mr-0.**

(A) Pollen viability (Alexander stainings) in *Mrfri* plants and in the *Mrfri* x Sha F1. Viable pollen grains are stained in red, aborted pollen grains appear in blue. (B) Segregation at L3 in the selfed progeny of the *Mrfri* x Sha F1 showing the same transmission distortion as in the Mr-0 x Sha F1.

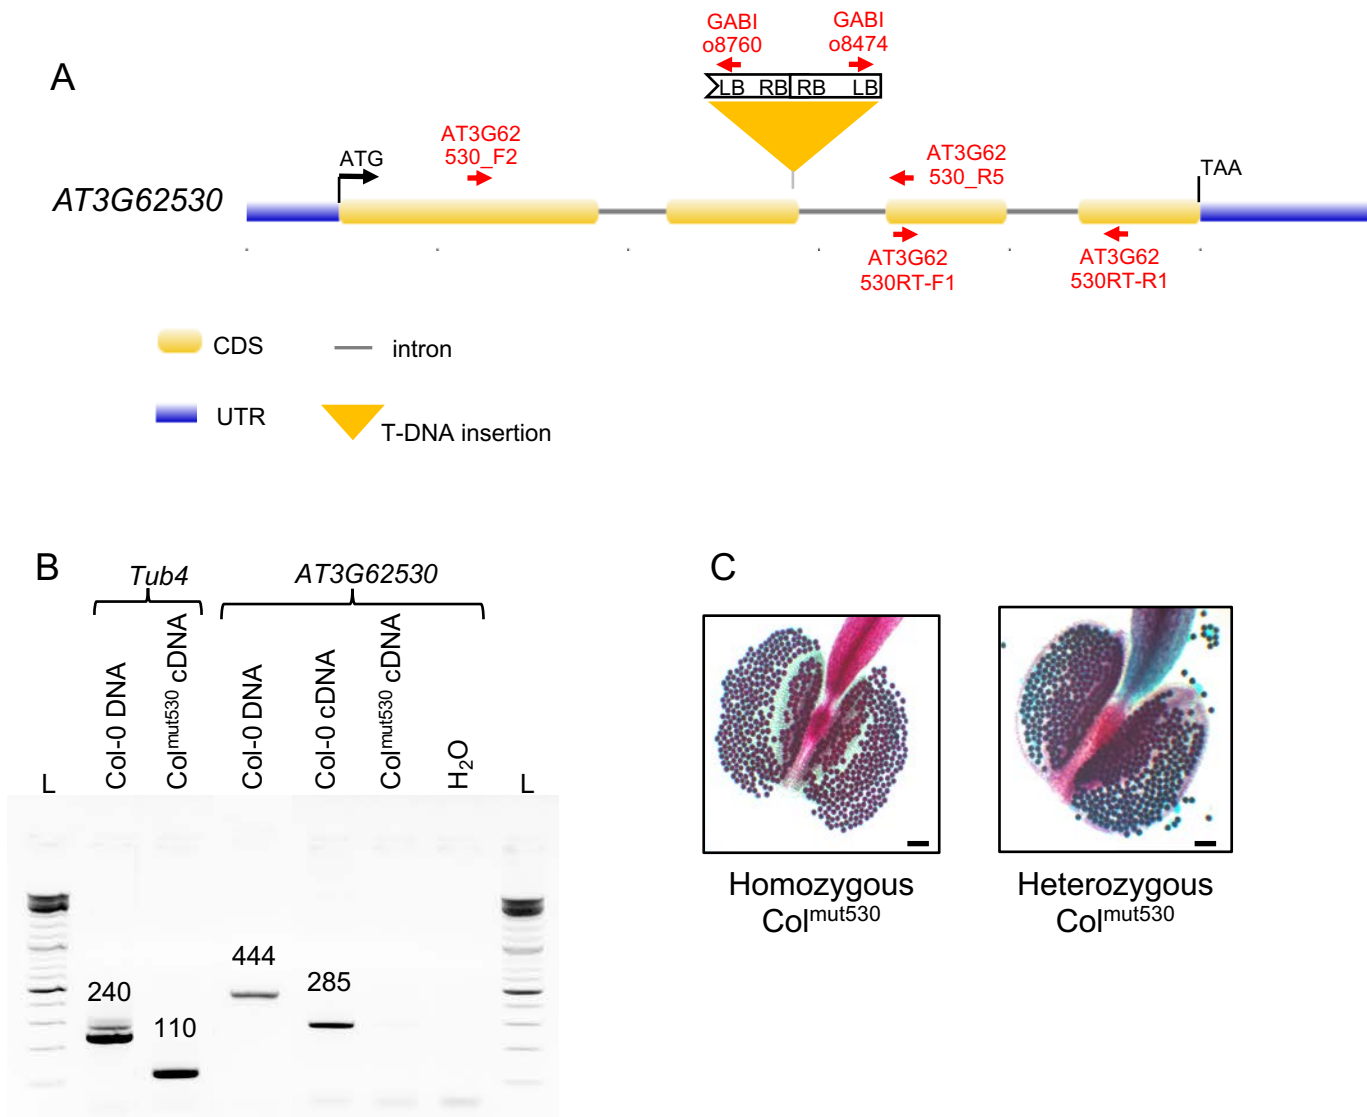

**Figure 8 supplement 2: Genetic and phenotypic characterization of *Col<sup>mut530</sup>*.**

A: Representation of the position and schematic structure of GABI 745G01 T-DNA insertion in *AT3G62530*, with some primers (in red) used for mutant characterization and gene expression analysis. The T-DNA insertion is a reverse tandem with an incomplete LB border, located at the end of exon 2 (TAIR10 position 23132690). B: Expression analysis by RT-PCR of *AT3G62530* in wild type (*Col-0*) and homozygous mutant (*Col<sup>mut530</sup>*) plants. PCR primers used are *AT3G62530RT-F1* & *AT3G62530RT-R1* (Supplemental File 1). *Tub4* (*AT5G44340*) serves as a positive control. L: Thermo Scientific™ GeneRuler DNA ladder mix. The expected sizes of the amplification products are indicated in bp above the bands. *AT3G62530* is undetectable in cDNA from leaves of the homozygous mutant whereas it is detected in cDNA of *Col-0* leaves. C: Representative images of anthers from homozygous and heterozygous *Col<sup>mut530</sup>* plants after Alexander staining. Anthers present only viable pollen (in red), demonstrating the mutation by itself does not induce pollen abortion. Scale bars: 100 $\mu$ m.

↓  
**A** MFLSQFRSCKPLLESRLPLLRLLSLKCLDQSFKTTASSEYGSKINKVTKHVNEEDGATFY 60  
 VTRRGAI DSSAPAESKAYPKAANISSIHSMRESLLEETEEDYRRLALFALRNHGGEDAI 120  
NVIIESLGVESSMIRIEAAFVLGQLESKTAIASLSKILRDVKEHPMVRVEAAKALGFIAD 180  
EKSREVLQELSGDLDPPIIAKGCDSLSILEFKNSKKYDPLI 221

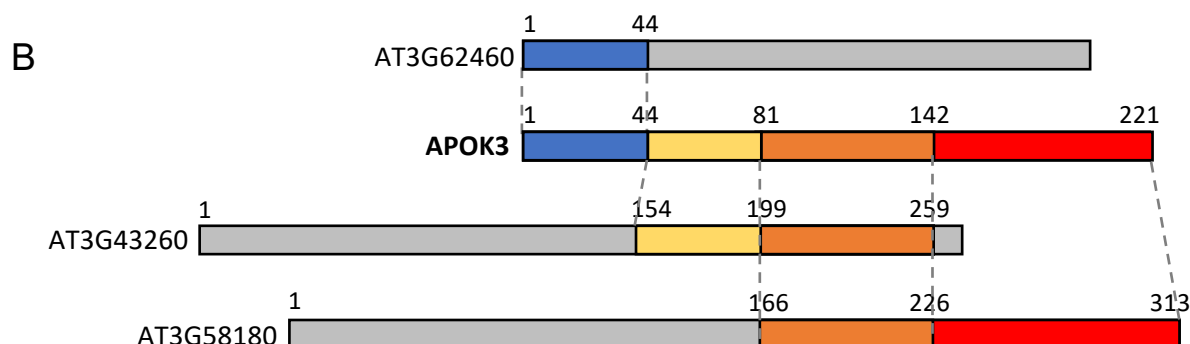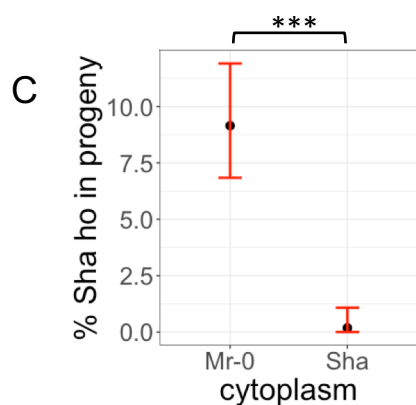

### Figure 9: Structure of APOK3.

**A:** Protein sequence of APOK3 in Col-0. The N-terminal mitochondria-targeting peptide (in blue) with a potential cleavage site between amino acids 32 and 33 (arrow) was predicted by TargetP2.0 (likelihood = 0.9; <http://www.cbs.dtu.dk/services/TargetP/>) (Almagro Armenteros et al. 2019). The three HEAT-repeat domains (underlined) were identified with SMART (Letunic et al. 2021). **B:** Representation of the composite APOK3 structure. Colours indicate the homologous regions between APOK3 and AT3G62460 (blue), AT3G43260 (yellow) and AT3G58180 (*A. thaliana* deoxyhypusine hydroxylase, Figure 9- Supplement 1) (red). The orange box corresponds to a region homologous between APOK3 and both AT3G43260 and AT3G58180. Grey boxes indicate regions of the proteins not aligning with APOK3. Genes encoding proteins similar to APOK3 in the Col-0 genome were retrieved through BlastP search (2.9.0+ default settings, Altschul et al, 1997) against Araport11 protein sequences on TAIR. **C:** Effect of cytoplasmic background on the strength of the PK3 induced TRD. Percentages of Sha homozygotes at PK3 were measured in three independent progeny pairs of reciprocal F1s that display the Sha/Mr-0 PK3 phenotype, in either Mr-0 or Sha cytoplasmic background. They were obtained by crossing both way with Sha three mapping recombinants and selecting F1s that were heterozygous on the whole PK3 interval (Figure 9 Source data 1). Dots indicate the average of Sha homozygote percentage for each cytoplasmic background. Red vertical bars indicate 0.95 confidence intervals. \*\*\* Fisher test  $p < 0.001$ .

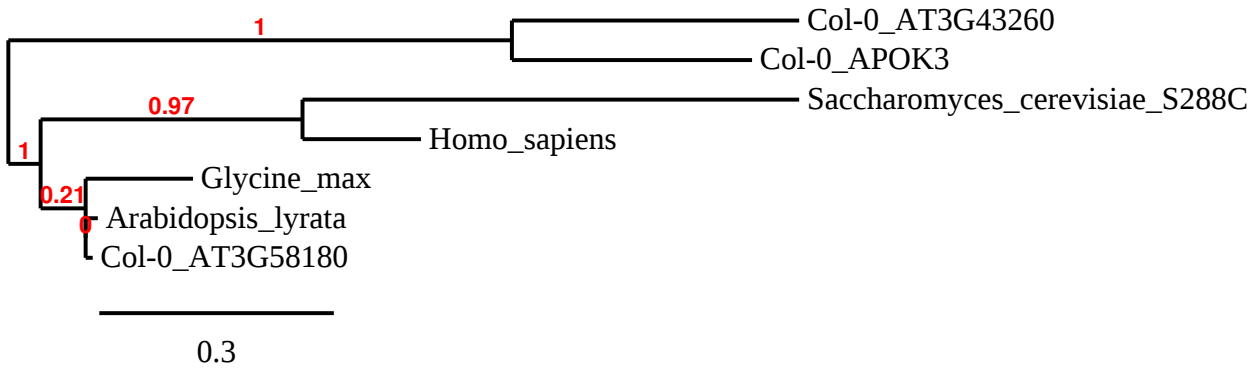

**Figure 9 Supplement 1 : Tree of protein sequences for deoxyhypusine hydroxylases from different taxa and their homologues in *A. thaliana*.**

The hydroxyhypusine hydroxylase protein sequences from human (NP\_001138637.1), baker's yeast (*Saccharomyces cerevisiae*, NP\_012604.1), soybean (*Glycine max*, XP\_003521278.1), and *A. thaliana* sister species *A. lyrata* (XP\_020880161.1) were aligned with those from Col-0 predicted products of genes *AT3G58180* (NP\_567062.1), *AT3G43260* (NP\_189912.1), and *AT3G62530* (APOK3; NP\_567129.1), using Phylogeny.fr ([http://www.phylogeny.fr/simple\\_phylogeny.cgi](http://www.phylogeny.fr/simple_phylogeny.cgi); (Dereeper et al. 2008) with defaults parameters. Branch support values are displayed in red over the branches.

A

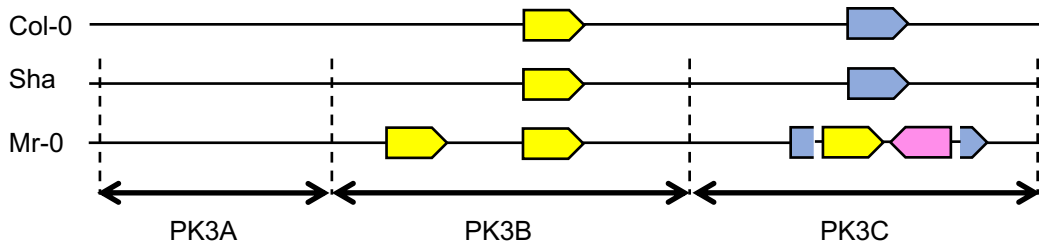

B

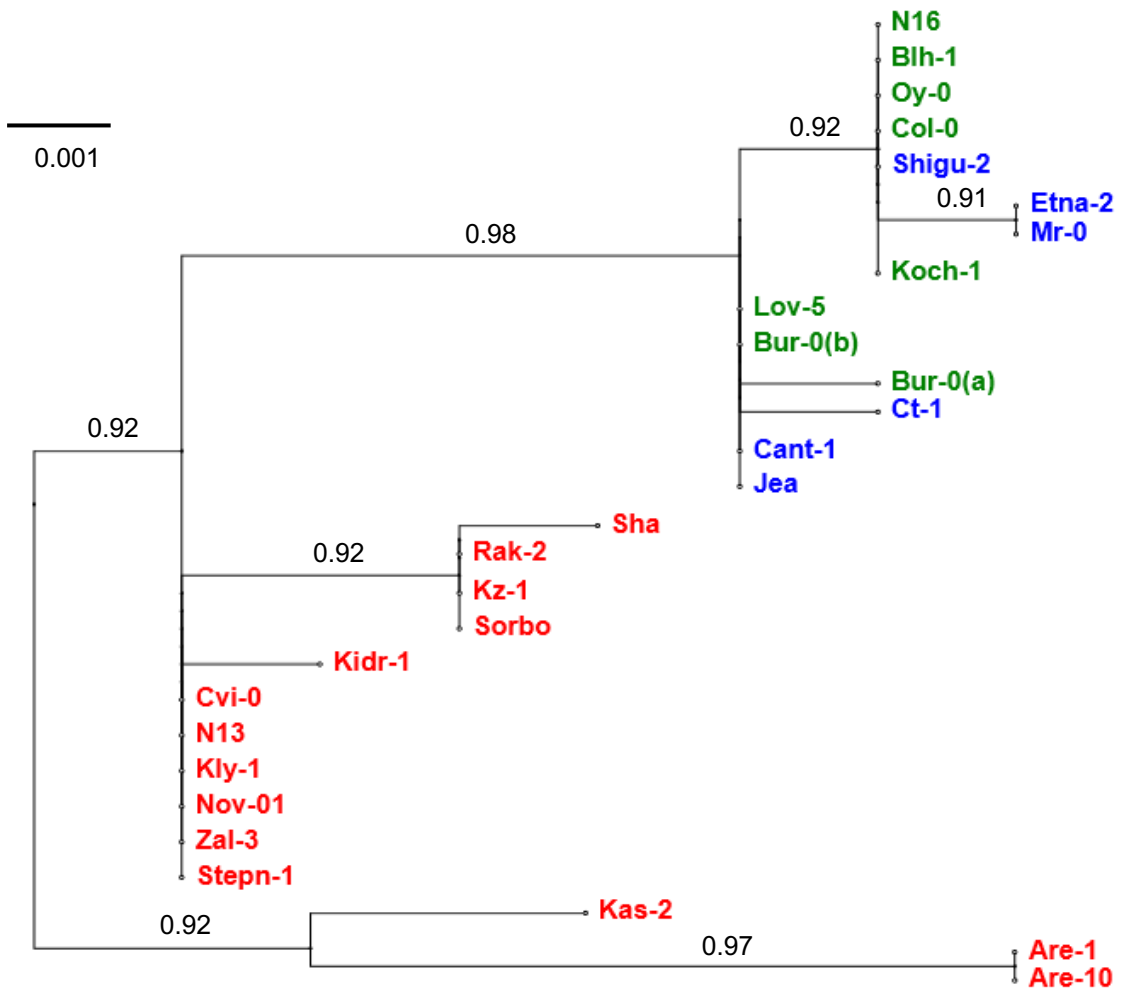

**Figure 10: Variation in *APOK3* copy numbers and sequences.** A: Schematic representation of *APOK3* homologous sequences (yellow arrows) in the PK3 locus in Col-0, Sha and Mr-0. The scheme is not to scale. Gene colours are as in Figure 7. The blue arrows represent *AT3G62610*, in which *APOK3*-like is inserted in Mr-0, together with *AT3G62540* (pink arrow). B: Variation in *APOK3* sequences : Unrooted phylogenetic tree generated from the *APOK3* copies of 27 accessions of known status for the PK. DNA sequences were obtained after amplification with the primers AT3G62530F1 and AT3G62530R1 (Supplemental File 1) and the tree was generated using Phylogeny <http://www.phylogeny.fr>, (Dereeper et al. 2008) (Figure 10 Source Data 1). The names of killer, neutral and killed accessions are written in blue, green and red, respectively. The accessions with several copies of *APOK3* are displayed only once because their copies are identical, except Bur-0 where two sequences (a) differs from the third (b) by one SNP. Branch support values are displayed over the branches.
